# Supplementary material for: Leishmania survives by exporting miR-146a from infected to resident cells to subjugate inflammation
Source: Life Sci Alliance. 2022 Feb 24;5(6):e202101229. doi: 10.26508/lsa.202101229 (PMC8881743; doi:10.26508/lsa.202101229)
Supplement: Supplementary file 5 [file LSA-2021-01229_TableS1.xls]

## Sheet: Non-Infected Cell EVs
Accession	Description	Score	Coverage	# Proteins	# Unique Peptides	# Peptides	# PSMs	# AAs	MW [kDa]	calc. pI
P20029	78 kDa glucose-regulated protein OS=Mus musculus GN=Hspa5 PE=1 SV=3 - [GRP78_MOUSE]	562.316	9.31	1	2	2	18	655	72.3775	5.16064
	A2	Sequence	# PSMs	# Proteins	# Protein Groups	Protein Group Accessions	Modifications	ΔCn	IonScore	Exp Value	Charge	MH+ [Da]	ΔM [ppm]	RT [min]	# Missed Cleavages
	High	IEIESFFEGEDFSETLTR	5	1	1	P20029		0	92.26	4.72462e-09	2	2149	-0.298591	83.5034	0
		Accession	Description	Score	Coverage	# Proteins	# Unique Peptides	# Peptides	# PSMs	# AAs	MW [kDa]	calc. pI
		P20029	78 kDa glucose-regulated protein OS=Mus musculus GN=Hspa5 PE=1 SV=3 - [GRP78_MOUSE]	562.316	9.31	1	2	2	18	655	72.3775	5.16064
	High	NILVFDLGGGTFDVSLLTIDNGVFEVVATNGDTHLGGEDFDQR	13	1	1	P20029		0	70.78	5.4732e-07	4	4567.25	4.73334	115.232	0
		Accession	Description	Score	Coverage	# Proteins	# Unique Peptides	# Peptides	# PSMs	# AAs	MW [kDa]	calc. pI
		P20029	78 kDa glucose-regulated protein OS=Mus musculus GN=Hspa5 PE=1 SV=3 - [GRP78_MOUSE]	562.316	9.31	1	2	2	18	655	72.3775	5.16064
P07724	Serum albumin OS=Mus musculus GN=Alb PE=1 SV=3 - [ALBU_MOUSE]	459.168	4.44	1	2	2	16	608	68.6477	6.07471
	A2	Sequence	# PSMs	# Proteins	# Protein Groups	Protein Group Accessions	Modifications	ΔCn	IonScore	Exp Value	Charge	MH+ [Da]	ΔM [ppm]	RT [min]	# Missed Cleavages
	High	LGEYGFQNAILVR	13	1	1	P07724		0	41.3	0.000789495	2	1479.79	-0.524375	65.2378	0
		Accession	Description	Score	Coverage	# Proteins	# Unique Peptides	# Peptides	# PSMs	# AAs	MW [kDa]	calc. pI
		P07724	Serum albumin OS=Mus musculus GN=Alb PE=1 SV=3 - [ALBU_MOUSE]	459.168	4.44	1	2	2	16	608	68.6477	6.07471
	High	EccHGDLLEcADDR	3	1	1	P07724	C2(Carbamidomethyl); C3(Carbamidomethyl); C10(Carbamidomethyl)	0	32.11	0.00061372	3	1749.66	-0.617333	39.6534	0
		Accession	Description	Score	Coverage	# Proteins	# Unique Peptides	# Peptides	# PSMs	# AAs	MW [kDa]	calc. pI
		P07724	Serum albumin OS=Mus musculus GN=Alb PE=1 SV=3 - [ALBU_MOUSE]	459.168	4.44	1	2	2	16	608	68.6477	6.07471
P19221	Prothrombin OS=Mus musculus GN=F2 PE=1 SV=1 - [THRB_MOUSE]	355.018	2.43	1	1	1	7	618	70.2237	6.43018
	A2	Sequence	# PSMs	# Proteins	# Protein Groups	Protein Group Accessions	Modifications	ΔCn	IonScore	Exp Value	Charge	MH+ [Da]	ΔM [ppm]	RT [min]	# Missed Cleavages
	High	WYQMGIVSWGEGcDR	7	1	1	P19221	C13(Carbamidomethyl)	0	76.71	6.9324e-08	2	1843.79	0.383569	73.5368	0
		Accession	Description	Score	Coverage	# Proteins	# Unique Peptides	# Peptides	# PSMs	# AAs	MW [kDa]	calc. pI
		P19221	Prothrombin OS=Mus musculus GN=F2 PE=1 SV=1 - [THRB_MOUSE]	355.018	2.43	1	1	1	7	618	70.2237	6.43018
P01942	Hemoglobin subunit alpha OS=Mus musculus GN=Hba PE=1 SV=2 - [HBA_MOUSE]	152.873	16.9	1	2	2	8	142	15.0758	8.22119
	A2	Sequence	# PSMs	# Proteins	# Protein Groups	Protein Group Accessions	Modifications	ΔCn	IonScore	Exp Value	Charge	MH+ [Da]	ΔM [ppm]	RT [min]	# Missed Cleavages
	High	IGGHGAEYGAEALER	6	1	1	P01942		0	46.91	0.000140556	3	1529.73	-1.07248	43.5367	0
		Accession	Description	Score	Coverage	# Proteins	# Unique Peptides	# Peptides	# PSMs	# AAs	MW [kDa]	calc. pI
		P01942	Hemoglobin subunit alpha OS=Mus musculus GN=Hba PE=1 SV=2 - [HBA_MOUSE]	152.873	16.9	1	2	2	8	142	15.0758	8.22119
	High	MFASFPTTK	2	1	1	P01942		0	27.6	0.0104268	2	1029.51	0.890794	49.5012	0
		Accession	Description	Score	Coverage	# Proteins	# Unique Peptides	# Peptides	# PSMs	# AAs	MW [kDa]	calc. pI
		P01942	Hemoglobin subunit alpha OS=Mus musculus GN=Hba PE=1 SV=2 - [HBA_MOUSE]	152.873	16.9	1	2	2	8	142	15.0758	8.22119
P17156	Heat shock-related 70 kDa protein 2 OS=Mus musculus GN=Hspa2 PE=1 SV=2 - [HSP72_MOUSE]	100.82	4.27	2	1	1	5	633	69.5987	5.66846
	A2	Sequence	# PSMs	# Proteins	# Protein Groups	Protein Group Accessions	Modifications	ΔCn	IonScore	Exp Value	Charge	MH+ [Da]	ΔM [ppm]	RT [min]	# Missed Cleavages
	High	NVLIFDLGGGTFDVSILTIEDGIFEVK	5	2	1	P17156		0	40.36	0.000616701	3	2911.54	2.50165	118.327	0
		Accession	Description	Score	Coverage	# Proteins	# Unique Peptides	# Peptides	# PSMs	# AAs	MW [kDa]	calc. pI
		P17156	Heat shock-related 70 kDa protein 2 OS=Mus musculus GN=Hspa2 PE=1 SV=2 - [HSP72_MOUSE]	100.82	4.27	2	1	1	5	633	69.5987	5.66846
Q61703	Inter-alpha-trypsin inhibitor heavy chain H2 OS=Mus musculus GN=Itih2 PE=1 SV=1 - [ITIH2_MOUSE]	94.748	2.75	1	2	2	8	946	105.861	7.26904
	A2	Sequence	# PSMs	# Proteins	# Protein Groups	Protein Group Accessions	Modifications	ΔCn	IonScore	Exp Value	Charge	MH+ [Da]	ΔM [ppm]	RT [min]	# Missed Cleavages
	High	IQPSGGTNINEALLR	2	1	1	Q61703		0	39.37	0.00104628	2	1582.85	-1.56602	50.5688	0
		Accession	Description	Score	Coverage	# Proteins	# Unique Peptides	# Peptides	# PSMs	# AAs	MW [kDa]	calc. pI
		Q61703	Inter-alpha-trypsin inhibitor heavy chain H2 OS=Mus musculus GN=Itih2 PE=1 SV=1 - [ITIH2_MOUSE]	94.748	2.75	1	2	2	8	946	105.861	7.26904
	High	VQFELHYQEVK	6	1	1	Q61703		0	33.17	0.00575928	3	1419.72	-1.29858	52.5538	0
		Accession	Description	Score	Coverage	# Proteins	# Unique Peptides	# Peptides	# PSMs	# AAs	MW [kDa]	calc. pI
		Q61703	Inter-alpha-trypsin inhibitor heavy chain H2 OS=Mus musculus GN=Itih2 PE=1 SV=1 - [ITIH2_MOUSE]	94.748	2.75	1	2	2	8	946	105.861	7.26904
P13020	Gelsolin OS=Mus musculus GN=Gsn PE=1 SV=3 - [GELS_MOUSE]	89.4577	3.46	1	1	2	4	780	85.8881	6.17627
	A2	Sequence	# PSMs	# Proteins	# Protein Groups	Protein Group Accessions	Modifications	ΔCn	IonScore	Exp Value	Charge	MH+ [Da]	ΔM [ppm]	RT [min]	# Missed Cleavages
	High	FDLVPVPPNLYGDFFTGDAYVILK	3	1	1	P13020		0	46.35	0.000196979	3	2700.4	1.60846	104.717	0
		Accession	Description	Score	Coverage	# Proteins	# Unique Peptides	# Peptides	# PSMs	# AAs	MW [kDa]	calc. pI
		P13020	Gelsolin OS=Mus musculus GN=Gsn PE=1 SV=3 - [GELS_MOUSE]	89.4577	3.46	1	1	2	4	780	85.8881	6.17627
	Low	VEKFDLVPVPPNLYGDFFTGDAYVILK	1	1	1	P13020		0	15.55	0.171346	3	3056.61	2.64027	97.4766	1
		Accession	Description	Score	Coverage	# Proteins	# Unique Peptides	# Peptides	# PSMs	# AAs	MW [kDa]	calc. pI
		P13020	Gelsolin OS=Mus musculus GN=Gsn PE=1 SV=3 - [GELS_MOUSE]	89.4577	3.46	1	1	2	4	780	85.8881	6.17627
P01027	Complement C3 OS=Mus musculus GN=C3 PE=1 SV=3 - [CO3_MOUSE]	81.8449	1.38	1	1	2	4	1663	186.366	6.72705
	A2	Sequence	# PSMs	# Proteins	# Protein Groups	Protein Group Accessions	Modifications	ΔCn	IonScore	Exp Value	Charge	MH+ [Da]	ΔM [ppm]	RT [min]	# Missed Cleavages
	High	EVVADSVWVDVK	3	1	1	P01027		0	54.77	3.81773e-05	2	1345.7	-0.275552	58.9392	0
		Accession	Description	Score	Coverage	# Proteins	# Unique Peptides	# Peptides	# PSMs	# AAs	MW [kDa]	calc. pI
		P01027	Complement C3 OS=Mus musculus GN=C3 PE=1 SV=3 - [CO3_MOUSE]	81.8449	1.38	1	1	2	4	1663	186.366	6.72705
	Low	AcEPGVDYVYK	1	1	1	P01027	C2(Carbamidomethyl)	0	16.48	0.0798414	2	1300.59	-0.40553	42.5547	0
		Accession	Description	Score	Coverage	# Proteins	# Unique Peptides	# Peptides	# PSMs	# AAs	MW [kDa]	calc. pI
		P01027	Complement C3 OS=Mus musculus GN=C3 PE=1 SV=3 - [CO3_MOUSE]	81.8449	1.38	1	1	2	4	1663	186.366	6.72705
Q61704	Inter-alpha-trypsin inhibitor heavy chain H3 OS=Mus musculus GN=Itih3 PE=1 SV=3 - [ITIH3_MOUSE]	81.4629	2.59	1	3	3	9	889	99.2957	6.04932
	A2	Sequence	# PSMs	# Proteins	# Protein Groups	Protein Group Accessions	Modifications	ΔCn	IonScore	Exp Value	Charge	MH+ [Da]	ΔM [ppm]	RT [min]	# Missed Cleavages
	High	VTFELTYEELLK	2	1	1	Q61704		0	37.49	0.00184476	2	1484.79	-0.0577142	77.8081	0
		Accession	Description	Score	Coverage	# Proteins	# Unique Peptides	# Peptides	# PSMs	# AAs	MW [kDa]	calc. pI
		Q61704	Inter-alpha-trypsin inhibitor heavy chain H3 OS=Mus musculus GN=Itih3 PE=1 SV=3 - [ITIH3_MOUSE]	81.4629	2.59	1	3	3	9	889	99.2957	6.04932
	High	EVSFDVELPK	3	1	1	Q61704		0	30.56	0.00997691	2	1162.6	-0.563418	59.1522	0
		Accession	Description	Score	Coverage	# Proteins	# Unique Peptides	# Peptides	# PSMs	# AAs	MW [kDa]	calc. pI
		Q61704	Inter-alpha-trypsin inhibitor heavy chain H3 OS=Mus musculus GN=Itih3 PE=1 SV=3 - [ITIH3_MOUSE]	81.4629	2.59	1	3	3	9	889	99.2957	6.04932
	Medium	VTFELTYEELLKR	4	1	1	Q61704		0	26.67	0.0189445	3	1640.89	-1.05543	73.1799	1
		Accession	Description	Score	Coverage	# Proteins	# Unique Peptides	# Peptides	# PSMs	# AAs	MW [kDa]	calc. pI
		Q61704	Inter-alpha-trypsin inhibitor heavy chain H3 OS=Mus musculus GN=Itih3 PE=1 SV=3 - [ITIH3_MOUSE]	81.4629	2.59	1	3	3	9	889	99.2957	6.04932
P29699	Alpha-2-HS-glycoprotein OS=Mus musculus GN=Ahsg PE=1 SV=1 - [FETUA_MOUSE]	81.3209	2.03	1	1	1	4	345	37.3017	6.50732
	A2	Sequence	# PSMs	# Proteins	# Protein Groups	Protein Group Accessions	Modifications	ΔCn	IonScore	Exp Value	Charge	MH+ [Da]	ΔM [ppm]	RT [min]	# Missed Cleavages
	High	cNLLAEK	4	1	1	P29699	C1(Carbamidomethyl)	0	49.73	0.000112799	2	847.433	-0.940554	30.0359	0
		Accession	Description	Score	Coverage	# Proteins	# Unique Peptides	# Peptides	# PSMs	# AAs	MW [kDa]	calc. pI
		P29699	Alpha-2-HS-glycoprotein OS=Mus musculus GN=Ahsg PE=1 SV=1 - [FETUA_MOUSE]	81.3209	2.03	1	1	1	4	345	37.3017	6.50732
P60710	Actin, cytoplasmic 1 OS=Mus musculus GN=Actb PE=1 SV=1 - [ACTB_MOUSE]	69.6817	15.2	7	2	3	6	375	41.7097	5.47803
	A2	Sequence	# PSMs	# Proteins	# Protein Groups	Protein Group Accessions	Modifications	ΔCn	IonScore	Exp Value	Charge	MH+ [Da]	ΔM [ppm]	RT [min]	# Missed Cleavages
	High	SYELPDGQVITIGNER	1	7	1	P60710		0	37.93	0.00190056	2	1790.89	1.58116	64.2369	0
		Accession	Description	Score	Coverage	# Proteins	# Unique Peptides	# Peptides	# PSMs	# AAs	MW [kDa]	calc. pI
		P60710	Actin, cytoplasmic 1 OS=Mus musculus GN=Actb PE=1 SV=1 - [ACTB_MOUSE]	69.6817	15.2	7	2	3	6	375	41.7097	5.47803
	High	LcYVALDFEQEMATAASSSSLEK	3	2	1	P60710	C2(Carbamidomethyl)	0	34.03	0.00260942	3	2550.17	0.0631792	82.3571	0
		Accession	Description	Score	Coverage	# Proteins	# Unique Peptides	# Peptides	# PSMs	# AAs	MW [kDa]	calc. pI
		P60710	Actin, cytoplasmic 1 OS=Mus musculus GN=Actb PE=1 SV=1 - [ACTB_MOUSE]	69.6817	15.2	7	2	3	6	375	41.7097	5.47803
	Low	VAPEEHPVLLTEAPLNPK	2	2	1	P60710		0	12.8	0.31226	3	1954.06	-1.0067	55.1522	0
		Accession	Description	Score	Coverage	# Proteins	# Unique Peptides	# Peptides	# PSMs	# AAs	MW [kDa]	calc. pI
		P60710	Actin, cytoplasmic 1 OS=Mus musculus GN=Actb PE=1 SV=1 - [ACTB_MOUSE]	69.6817	15.2	7	2	3	6	375	41.7097	5.47803
P63082	V-type proton ATPase 16 kDa proteolipid subunit OS=Mus musculus GN=Atp6v0c PE=2 SV=1 - [VATL_MOUSE]	61.25	18.71	1	1	1	1	155	15.7975	9.12939
	A2	Sequence	# PSMs	# Proteins	# Protein Groups	Protein Group Accessions	Modifications	ΔCn	IonScore	Exp Value	Charge	MH+ [Da]	ΔM [ppm]	RT [min]	# Missed Cleavages
	High	LFVGmILILIFAEVLGLYGLIVALILSTK	1	1	1	P63082	M5(Oxidation)	0	61.25	7.48118e-07	3	3148.91	2.2254	125.103	0
		Accession	Description	Score	Coverage	# Proteins	# Unique Peptides	# Peptides	# PSMs	# AAs	MW [kDa]	calc. pI
		P63082	V-type proton ATPase 16 kDa proteolipid subunit OS=Mus musculus GN=Atp6v0c PE=2 SV=1 - [VATL_MOUSE]	61.25	18.71	1	1	1	1	155	15.7975	9.12939
P62962	Profilin-1 OS=Mus musculus GN=Pfn1 PE=1 SV=2 - [PROF1_MOUSE]	57.85	10	1	1	1	1	140	14.9475	8.27979
	A2	Sequence	# PSMs	# Proteins	# Protein Groups	Protein Group Accessions	Modifications	ΔCn	IonScore	Exp Value	Charge	MH+ [Da]	ΔM [ppm]	RT [min]	# Missed Cleavages
	High	DSLLQDGEFTMDLR	1	1	1	P62962		0	57.85	1.27966e-05	2	1639.76	0.0316892	72.6586	0
		Accession	Description	Score	Coverage	# Proteins	# Unique Peptides	# Peptides	# PSMs	# AAs	MW [kDa]	calc. pI
		P62962	Profilin-1 OS=Mus musculus GN=Pfn1 PE=1 SV=2 - [PROF1_MOUSE]	57.85	10	1	1	1	1	140	14.9475	8.27979
Q8BFR6	AN1-type zinc finger protein 1 OS=Mus musculus GN=Zfand1 PE=1 SV=1 - [ZFAN1_MOUSE]	52.9741	3.36	1	1	1	5	268	30.183	8.104
	A2	Sequence	# PSMs	# Proteins	# Protein Groups	Protein Group Accessions	Modifications	ΔCn	IonScore	Exp Value	Charge	MH+ [Da]	ΔM [ppm]	RT [min]	# Missed Cleavages
	High	MAATQKLVR	5	1	1	Q8BFR6		0	32.38	0.00471148	2	1017.58	-4.11051	51.2923	1
		Accession	Description	Score	Coverage	# Proteins	# Unique Peptides	# Peptides	# PSMs	# AAs	MW [kDa]	calc. pI
		Q8BFR6	AN1-type zinc finger protein 1 OS=Mus musculus GN=Zfand1 PE=1 SV=1 - [ZFAN1_MOUSE]	52.9741	3.36	1	1	1	5	268	30.183	8.104
P14069	Protein S100-A6 OS=Mus musculus GN=S100a6 PE=1 SV=3 - [S10A6_MOUSE]	41.62	30.34	1	1	1	2	89	10.0443	5.47803
	A2	Sequence	# PSMs	# Proteins	# Protein Groups	Protein Group Accessions	Modifications	ΔCn	IonScore	Exp Value	Charge	MH+ [Da]	ΔM [ppm]	RT [min]	# Missed Cleavages
	High	NKDQEVNFQEYVAFLGALALIYNEALK	2	1	1	P14069		0	32.46	0.00456873	3	3100.61	2.04494	115.357	1
		Accession	Description	Score	Coverage	# Proteins	# Unique Peptides	# Peptides	# PSMs	# AAs	MW [kDa]	calc. pI
		P14069	Protein S100-A6 OS=Mus musculus GN=S100a6 PE=1 SV=3 - [S10A6_MOUSE]	41.62	30.34	1	1	1	2	89	10.0443	5.47803
P28665	Murinoglobulin-1 OS=Mus musculus GN=Mug1 PE=1 SV=3 - [MUG1_MOUSE]	41.2	0.54	1	1	1	2	1476	165.193	6.41748
	A2	Sequence	# PSMs	# Proteins	# Protein Groups	Protein Group Accessions	Modifications	ΔCn	IonScore	Exp Value	Charge	MH+ [Da]	ΔM [ppm]	RT [min]	# Missed Cleavages
	High	FQVENSNR	2	1	1	P28665		0	41.2	0.00051204	2	993.474	-0.58435	22.3474	0
		Accession	Description	Score	Coverage	# Proteins	# Unique Peptides	# Peptides	# PSMs	# AAs	MW [kDa]	calc. pI
		P28665	Murinoglobulin-1 OS=Mus musculus GN=Mug1 PE=1 SV=3 - [MUG1_MOUSE]	41.2	0.54	1	1	1	2	1476	165.193	6.41748
Q9D1H6	NADH dehydrogenase [ubiquinone] 1 alpha subcomplex assembly factor 4 OS=Mus musculus GN=Ndufaf4 PE=2 SV=1 - [NDUF4_MOUSE]	35.5807	4.05	1	1	1	4	173	20.0698	9.39307
	A2	Sequence	# PSMs	# Proteins	# Protein Groups	Protein Group Accessions	Modifications	ΔCn	IonScore	Exp Value	Charge	MH+ [Da]	ΔM [ppm]	RT [min]	# Missed Cleavages
	Medium	KPSMAPK	4	1	1	Q9D1H6		0	29.37	0.014856	2	758.422	-1.38274	32.0807	0
		Accession	Description	Score	Coverage	# Proteins	# Unique Peptides	# Peptides	# PSMs	# AAs	MW [kDa]	calc. pI
		Q9D1H6	NADH dehydrogenase [ubiquinone] 1 alpha subcomplex assembly factor 4 OS=Mus musculus GN=Ndufaf4 PE=2 SV=1 - [NDUF4_MOUSE]	35.5807	4.05	1	1	1	4	173	20.0698	9.39307
P50247	Adenosylhomocysteinase OS=Mus musculus GN=Ahcy PE=1 SV=3 - [SAHH_MOUSE]	34.34	2.78	1	1	1	1	432	47.6573	6.53662
	A2	Sequence	# PSMs	# Proteins	# Protein Groups	Protein Group Accessions	Modifications	ΔCn	IonScore	Exp Value	Charge	MH+ [Da]	ΔM [ppm]	RT [min]	# Missed Cleavages
	High	VAVVAGYGDVGK	1	1	1	P50247		0	34.34	0.00377332	2	1134.61	-2.48091	39.4463	0
		Accession	Description	Score	Coverage	# Proteins	# Unique Peptides	# Peptides	# PSMs	# AAs	MW [kDa]	calc. pI
		P50247	Adenosylhomocysteinase OS=Mus musculus GN=Ahcy PE=1 SV=3 - [SAHH_MOUSE]	34.34	2.78	1	1	1	1	432	47.6573	6.53662
P84244	Histone H3.3 OS=Mus musculus GN=H3f3a PE=1 SV=2 - [H33_MOUSE]	32.24	23.53	1	1	1	1	136	15.3185	11.2681
	A2	Sequence	# PSMs	# Proteins	# Protein Groups	Protein Group Accessions	Modifications	ΔCn	IonScore	Exp Value	Charge	MH+ [Da]	ΔM [ppm]	RT [min]	# Missed Cleavages
	High	FQSAAIGALQEASEAYLVGLFEDTNLcAIHAK	1	1	1	P84244	C27(Carbamidomethyl)	0	32.24	0.00662709	3	3437.71	1.72533	106.408	0
		Accession	Description	Score	Coverage	# Proteins	# Unique Peptides	# Peptides	# PSMs	# AAs	MW [kDa]	calc. pI
		P84244	Histone H3.3 OS=Mus musculus GN=H3f3a PE=1 SV=2 - [H33_MOUSE]	32.24	23.53	1	1	1	1	136	15.3185	11.2681
Q61329	Zinc finger homeobox protein 3 OS=Mus musculus GN=Zfhx3 PE=1 SV=1 - [ZFHX3_MOUSE]	27.82	1.02	1	1	2	12	3726	406.315	6.23975
	A2	Sequence	# PSMs	# Proteins	# Protein Groups	Protein Group Accessions	Modifications	ΔCn	IonScore	Exp Value	Charge	MH+ [Da]	ΔM [ppm]	RT [min]	# Missed Cleavages
	Medium	AEQGGESLEKLEcDSCGKLFSNILILK	10	1	1	Q61329	C13(Carbamidomethyl)	0	27.82	0.0155284	3	2981.51	6.35296	103.073	2
		Accession	Description	Score	Coverage	# Proteins	# Unique Peptides	# Peptides	# PSMs	# AAs	MW [kDa]	calc. pI
		Q61329	Zinc finger homeobox protein 3 OS=Mus musculus GN=Zfhx3 PE=1 SV=1 - [ZFHX3_MOUSE]	27.82	1.02	1	1	2	12	3726	406.315	6.23975
	Low	EGGKANEWRLK	2	1	1	Q61329		0.4118	10.18	1.07453	2	1287.69	6.90955	51.1104	2
		Accession	Description	Score	Coverage	# Proteins	# Unique Peptides	# Peptides	# PSMs	# AAs	MW [kDa]	calc. pI
		Q61329	Zinc finger homeobox protein 3 OS=Mus musculus GN=Zfhx3 PE=1 SV=1 - [ZFHX3_MOUSE]	27.82	1.02	1	1	2	12	3726	406.315	6.23975
Q6IFZ9	Keratin, type II cytoskeletal 74 OS=Mus musculus GN=Krt74 PE=2 SV=1 - [K2C74_MOUSE]	27.75	2.42	5	1	1	1	495	54.7123	5.71924
	A2	Sequence	# PSMs	# Proteins	# Protein Groups	Protein Group Accessions	Modifications	ΔCn	IonScore	Exp Value	Charge	MH+ [Da]	ΔM [ppm]	RT [min]	# Missed Cleavages
	Medium	FLEQQNQVLQTK	1	5	1	Q6IFZ9		0	27.75	0.0199778	2	1475.78	-1.65118	42.6455	0
		Accession	Description	Score	Coverage	# Proteins	# Unique Peptides	# Peptides	# PSMs	# AAs	MW [kDa]	calc. pI
		Q6IFZ9	Keratin, type II cytoskeletal 74 OS=Mus musculus GN=Krt74 PE=2 SV=1 - [K2C74_MOUSE]	27.75	2.42	5	1	1	1	495	54.7123	5.71924
Q9JK45	Potassium voltage-gated channel subfamily KQT member 5 OS=Mus musculus GN=Kcnq5 PE=1 SV=2 - [KCNQ5_MOUSE]	24.93	0.86	1	1	1	3	933	102.194	9.49561
	A2	Sequence	# PSMs	# Proteins	# Protein Groups	Protein Group Accessions	Modifications	ΔCn	IonScore	Exp Value	Charge	MH+ [Da]	ΔM [ppm]	RT [min]	# Missed Cleavages
	Medium	SASANISR	3	1	1	Q9JK45		0	24.93	0.0451519	2	805.416	-0.510521	13.7621	0
		Accession	Description	Score	Coverage	# Proteins	# Unique Peptides	# Peptides	# PSMs	# AAs	MW [kDa]	calc. pI
		Q9JK45	Potassium voltage-gated channel subfamily KQT member 5 OS=Mus musculus GN=Kcnq5 PE=1 SV=2 - [KCNQ5_MOUSE]	24.93	0.86	1	1	1	3	933	102.194	9.49561
Q8BLN6	Protein unc-80 homolog OS=Mus musculus GN=Unc80 PE=1 SV=2 - [UNC80_MOUSE]	24.93	0.34	1	1	1	3	3261	363.275	6.88818
	A2	Sequence	# PSMs	# Proteins	# Protein Groups	Protein Group Accessions	Modifications	ΔCn	IonScore	Exp Value	Charge	MH+ [Da]	ΔM [ppm]	RT [min]	# Missed Cleavages
	High	SSEGQEQDGGR	3	1	1	Q8BLN6		0	23.16	0.00481915	2	1149.47	-9.99051	18.0259	0
		Accession	Description	Score	Coverage	# Proteins	# Unique Peptides	# Peptides	# PSMs	# AAs	MW [kDa]	calc. pI
		Q8BLN6	Protein unc-80 homolog OS=Mus musculus GN=Unc80 PE=1 SV=2 - [UNC80_MOUSE]	24.93	0.34	1	1	1	3	3261	363.275	6.88818
P14211	Calreticulin OS=Mus musculus GN=Calr PE=1 SV=1 - [CALR_MOUSE]	24.65	6.97	1	1	1	1	416	47.9649	4.48779
	A2	Sequence	# PSMs	# Proteins	# Protein Groups	Protein Group Accessions	Modifications	ΔCn	IonScore	Exp Value	Charge	MH+ [Da]	ΔM [ppm]	RT [min]	# Missed Cleavages
	Medium	SGTIFDNFLITNDEAYAEEFGNETWGVTK	1	1	1	P14211		0	24.65	0.021423	3	3268.51	5.41274	94.6881	0
		Accession	Description	Score	Coverage	# Proteins	# Unique Peptides	# Peptides	# PSMs	# AAs	MW [kDa]	calc. pI
		P14211	Calreticulin OS=Mus musculus GN=Calr PE=1 SV=1 - [CALR_MOUSE]	24.65	6.97	1	1	1	1	416	47.9649	4.48779
Q8BWQ4	FtsJ methyltransferase domain-containing protein 1 OS=Mus musculus GN=Ftsjd1 PE=2 SV=1 - [FTSJ1_MOUSE]	24.56	1.17	1	1	1	4	767	87.0857	7.07861
	A2	Sequence	# PSMs	# Proteins	# Protein Groups	Protein Group Accessions	Modifications	ΔCn	IonScore	Exp Value	Charge	MH+ [Da]	ΔM [ppm]	RT [min]	# Missed Cleavages
	Medium	KMMETLSWK	4	1	1	Q8BWQ4		0	24.56	0.0285205	2	1153.57	-1.77363	41.1678	1
		Accession	Description	Score	Coverage	# Proteins	# Unique Peptides	# Peptides	# PSMs	# AAs	MW [kDa]	calc. pI
		Q8BWQ4	FtsJ methyltransferase domain-containing protein 1 OS=Mus musculus GN=Ftsjd1 PE=2 SV=1 - [FTSJ1_MOUSE]	24.56	1.17	1	1	1	4	767	87.0857	7.07861
Q6GQT1	Alpha-2-macroglobulin-P OS=Mus musculus GN=A2mp PE=2 SV=2 - [A2MP_MOUSE]	23.9	2.37	1	2	3	4	1474	164.248	6.60986
	A2	Sequence	# PSMs	# Proteins	# Protein Groups	Protein Group Accessions	Modifications	ΔCn	IonScore	Exp Value	Charge	MH+ [Da]	ΔM [ppm]	RT [min]	# Missed Cleavages
	Medium	TEVSNNHVLIYLDK	2	1	1	Q6GQT1		0	23.48	0.0477914	3	1644.86	-0.621847	53.3409	0
		Accession	Description	Score	Coverage	# Proteins	# Unique Peptides	# Peptides	# PSMs	# AAs	MW [kDa]	calc. pI
		Q6GQT1	Alpha-2-macroglobulin-P OS=Mus musculus GN=A2mp PE=2 SV=2 - [A2MP_MOUSE]	23.9	2.37	1	2	3	4	1474	164.248	6.60986
	Low	MVSGFIPLKPTVK	1	1	1	Q6GQT1		0	17.92	0.0548882	3	1416.83	-0.881708	57.517	0
		Accession	Description	Score	Coverage	# Proteins	# Unique Peptides	# Peptides	# PSMs	# AAs	MW [kDa]	calc. pI
		Q6GQT1	Alpha-2-macroglobulin-P OS=Mus musculus GN=A2mp PE=2 SV=2 - [A2MP_MOUSE]	23.9	2.37	1	2	3	4	1474	164.248	6.60986
	Medium	DLKPAIVK	1	1	1	Q6GQT1		0	13.94	0.0504557	2	883.56	-1.35495	31.5502	0
		Accession	Description	Score	Coverage	# Proteins	# Unique Peptides	# Peptides	# PSMs	# AAs	MW [kDa]	calc. pI
		Q6GQT1	Alpha-2-macroglobulin-P OS=Mus musculus GN=A2mp PE=2 SV=2 - [A2MP_MOUSE]	23.9	2.37	1	2	3	4	1474	164.248	6.60986
Q80U28	MAP kinase-activating death domain protein OS=Mus musculus GN=Madd PE=1 SV=2 - [MADD_MOUSE]	23.84	0.63	1	1	1	3	1577	175.07	6.03662
	A2	Sequence	# PSMs	# Proteins	# Protein Groups	Protein Group Accessions	Modifications	ΔCn	IonScore	Exp Value	Charge	MH+ [Da]	ΔM [ppm]	RT [min]	# Missed Cleavages
	Medium	SPVPVSGQKR	3	1	1	Q80U28		0	23.84	0.0214785	2	1054.59	-6.74382	62.8262	1
		Accession	Description	Score	Coverage	# Proteins	# Unique Peptides	# Peptides	# PSMs	# AAs	MW [kDa]	calc. pI
		Q80U28	MAP kinase-activating death domain protein OS=Mus musculus GN=Madd PE=1 SV=2 - [MADD_MOUSE]	23.84	0.63	1	1	1	3	1577	175.07	6.03662
P10126	Elongation factor 1-alpha 1 OS=Mus musculus GN=Eef1a1 PE=1 SV=3 - [EF1A1_MOUSE]	22.72	6.93	1	1	1	1	462	50.0821	9.01221
	A2	Sequence	# PSMs	# Proteins	# Protein Groups	Protein Group Accessions	Modifications	ΔCn	IonScore	Exp Value	Charge	MH+ [Da]	ΔM [ppm]	RT [min]	# Missed Cleavages
	Medium	IGYNPDTVAFVPISGWNGDNMLEPSANMPWFK	1	1	1	P10126		0	22.72	0.0344794	3	3567.66	-2.29006	96.4204	0
		Accession	Description	Score	Coverage	# Proteins	# Unique Peptides	# Peptides	# PSMs	# AAs	MW [kDa]	calc. pI
		P10126	Elongation factor 1-alpha 1 OS=Mus musculus GN=Eef1a1 PE=1 SV=3 - [EF1A1_MOUSE]	22.72	6.93	1	1	1	1	462	50.0821	9.01221
P97477	Aurora kinase A OS=Mus musculus GN=Aurka PE=1 SV=1 - [AURKA_MOUSE]	22.01	2.28	1	1	1	6	395	44.7442	9.37842
	A2	Sequence	# PSMs	# Proteins	# Protein Groups	Protein Group Accessions	Modifications	ΔCn	IonScore	Exp Value	Charge	MH+ [Da]	ΔM [ppm]	RT [min]	# Missed Cleavages
	Medium	TTVPFGPKR	6	1	1	P97477		0	22.01	0.048472	2	1002.58	9.64506	47.476	1
		Accession	Description	Score	Coverage	# Proteins	# Unique Peptides	# Peptides	# PSMs	# AAs	MW [kDa]	calc. pI
		P97477	Aurora kinase A OS=Mus musculus GN=Aurka PE=1 SV=1 - [AURKA_MOUSE]	22.01	2.28	1	1	1	6	395	44.7442	9.37842
O35955	Proteasome subunit beta type-10 OS=Mus musculus GN=Psmb10 PE=1 SV=1 - [PSB10_MOUSE]	21.83	15.75	1	1	1	1	273	29.045	6.87354
	A2	Sequence	# PSMs	# Proteins	# Protein Groups	Protein Group Accessions	Modifications	ΔCn	IonScore	Exp Value	Charge	MH+ [Da]	ΔM [ppm]	RT [min]	# Missed Cleavages
	Medium	FQPNmTLEAAQELLVEAITAGILSDLGSGGNVDAcVITAGGAK	1	1	1	O35955	M5(Oxidation); C35(Carbamidomethyl)	0	21.83	0.0505232	5	4318.13	-5.43645	91.6907	0
		Accession	Description	Score	Coverage	# Proteins	# Unique Peptides	# Peptides	# PSMs	# AAs	MW [kDa]	calc. pI
		O35955	Proteasome subunit beta type-10 OS=Mus musculus GN=Psmb10 PE=1 SV=1 - [PSB10_MOUSE]	21.83	15.75	1	1	1	1	273	29.045	6.87354

## Sheet: Infected Cell EVs
Accession	Description	Score	Coverage	# Proteins	# Unique Peptides	# Peptides	# PSMs	# AAs	MW [kDa]	calc. pI
P07724	Serum albumin OS=Mus musculus GN=Alb PE=1 SV=3 - [ALBU_MOUSE]	443.575	5.59	1	2	3	14	608	68.6477	6.07471
	A2	Sequence	# PSMs	# Proteins	# Protein Groups	Protein Group Accessions	Modifications	ΔCn	IonScore	Exp Value	Charge	MH+ [Da]	ΔM [ppm]	RT [min]	# Missed Cleavages
	High	LGEYGFQNAILVR	10	1	1	P07724		0	54.99	3.23296e-05	2	1479.8	0.053065	68.1147	0
	High	EccHGDLLEcADDR	3	1	1	P07724	C2(Carbamidomethyl); C3(Carbamidomethyl); C10(Carbamidomethyl)	0	25.5	0.00281171	3	1749.66	-2.39642	40.2461	0
	Low	VcLLHEK	1	1	1	P07724	C2(Carbamidomethyl)	0.1429	12.06	0.314262	2	898.48	-1.94926	30.8025	0
P20029	78 kDa glucose-regulated protein OS=Mus musculus GN=Hspa5 PE=1 SV=3 - [GRP78_MOUSE]	427.775	9.31	1	2	2	11	655	72.3775	5.16064
	A2	Sequence	# PSMs	# Proteins	# Protein Groups	Protein Group Accessions	Modifications	ΔCn	IonScore	Exp Value	Charge	MH+ [Da]	ΔM [ppm]	RT [min]	# Missed Cleavages
	High	IEIESFFEGEDFSETLTR	6	1	1	P20029		0	96.81	1.73013e-09	2	2149	1.06469	83.7068	0
	High	NILVFDLGGGTFDVSLLTIDNGVFEVVATNGDTHLGGEDFDQR	5	1	1	P20029		0	50.28	6.60981e-05	4	4567.23	1.63298	117.514	0
P19221	Prothrombin OS=Mus musculus GN=F2 PE=1 SV=1 - [THRB_MOUSE]	287.481	2.43	1	1	1	5	618	70.2237	6.43018
	A2	Sequence	# PSMs	# Proteins	# Protein Groups	Protein Group Accessions	Modifications	ΔCn	IonScore	Exp Value	Charge	MH+ [Da]	ΔM [ppm]	RT [min]	# Missed Cleavages
	High	WYQMGIVSWGEGcDR	5	1	1	P19221	C13(Carbamidomethyl)	0	79.57	3.58826e-08	2	1843.79	0.317363	74.102	0
P52480	Pyruvate kinase isozymes M1/M2 OS=Mus musculus GN=Pkm2 PE=1 SV=4 - [KPYM_MOUSE]	282.662	8.85	1	4	4	8	531	57.808	7.47412
	A2	Sequence	# PSMs	# Proteins	# Protein Groups	Protein Group Accessions	Modifications	ΔCn	IonScore	Exp Value	Charge	MH+ [Da]	ΔM [ppm]	RT [min]	# Missed Cleavages
	High	IYVDDGLISLQVK	2	1	1	P52480		0	79.09	9.49491e-08	2	1462.81	-1.25047	70.8226	0
	High	DAVLNAWAEDVDLR	2	1	1	P52480		0	64.8	3.19542e-06	2	1586.78	0.956024	73.5978	0
	High	cDENILWLDYK	2	1	1	P52480	C1(Carbamidomethyl)	0	57.55	9.93227e-06	2	1468.68	-1.30488	69.2789	0
	High	VNLAMDVGK	2	1	1	P52480		0	53.46	4.8012e-05	2	946.502	-0.471669	40.5867	0
P17182	Alpha-enolase OS=Mus musculus GN=Eno1 PE=1 SV=3 - [ENOA_MOUSE]	198.56	18.2	3	4	5	9	434	47.1112	6.80029
	A2	Sequence	# PSMs	# Proteins	# Protein Groups	Protein Group Accessions	Modifications	ΔCn	IonScore	Exp Value	Charge	MH+ [Da]	ΔM [ppm]	RT [min]	# Missed Cleavages
	High	SFVQNYPVVSIEDPFDQDDWGAWQK	3	1	1	P17182		0	73.55	3.09099e-07	3	2970.36	0.591568	88.4372	0
	High	VNQIGSVTESLQAcK	1	2	1	P17182	C14(Carbamidomethyl)	0	47.21	0.000226228	2	1633.82	-1.19946	48.2815	0
	High	LMIEMDGTENK	2	1	1	P17182		0	39.95	0.000637295	2	1280.59	-0.153212	45.7606	0
	High	GNPTVEVDLYTAK	2	2	1	P17182		0	33.39	0.00510828	2	1406.71	-1.30676	49.9341	0
	Low	FGANAILGVSLAVCK	1	3	1	P17182		0.8481	11.7	0.520584	2	1462.81	3.19302	70.8226	0
P40240	CD9 antigen OS=Mus musculus GN=Cd9 PE=1 SV=2 - [CD9_MOUSE]	179.48	11.06	1	1	1	4	226	25.2409	7.2251
	A2	Sequence	# PSMs	# Proteins	# Protein Groups	Protein Group Accessions	Modifications	ΔCn	IonScore	Exp Value	Charge	MH+ [Da]	ΔM [ppm]	RT [min]	# Missed Cleavages
	High	AIHMALDccGIAGPLEQFISDTcPK	4	1	1	P40240	C8(Carbamidomethyl); C9(Carbamidomethyl); C23(Carbamidomethyl)	0	63.19	3.14225e-06	3	2804.29	0.692011	87.5917	0
P10126	Elongation factor 1-alpha 1 OS=Mus musculus GN=Eef1a1 PE=1 SV=3 - [EF1A1_MOUSE]	149.677	9.74	1	3	3	8	462	50.0821	9.01221
	A2	Sequence	# PSMs	# Proteins	# Protein Groups	Protein Group Accessions	Modifications	ΔCn	IonScore	Exp Value	Charge	MH+ [Da]	ΔM [ppm]	RT [min]	# Missed Cleavages
	High	KIGYNPDTVAFVPISGWNGDNMLEPSANMPWFK	1	1	1	P10126		0	96.78	1.87855e-09	3	3695.78	4.36241	95.2633	1
	High	YYVTIIDAPGHR	1	1	1	P10126		0	42.82	0.000535456	3	1404.73	-0.700098	53.2426	0
	High	IGYNPDTVAFVPISGWNGDNMLEPSANmPWFK	4	1	1	P10126	M28(Oxidation)	0	38.09	0.000946956	3	3583.67	0.603808	94.6416	0
	High	IGYNPDTVAFVPISGWNGDNMLEPSANMPWFK	2	1	1	P10126		0	29.22	0.00801816	3	3567.68	2.84229	95.9078	0
P63017	Heat shock cognate 71 kDa protein OS=Mus musculus GN=Hspa8 PE=1 SV=1 - [HSP7C_MOUSE]	126.137	10.99	2	1	3	13	646	70.8272	5.51611
	A2	Sequence	# PSMs	# Proteins	# Protein Groups	Protein Group Accessions	Modifications	ΔCn	IonScore	Exp Value	Charge	MH+ [Da]	ΔM [ppm]	RT [min]	# Missed Cleavages
	High	NVLIFDLGGGTFDVSILTIEDGIFEVK	11	2	1	P63017		0	44.07	0.000250715	3	2911.54	3.44499	117.389	0
	Low	DAGTIAGLNVLR	1	1	1	P63017		0	15.97	0.266841	2	1199.67	0.434273	59.5117	0
	Low	RNTTIPTKQTQTFTTYSDNQPGVLIQVYEGER	1	1	1	P63017		0	12.36	0.551726	4	3685.82	-7.39568	82.824	2
P13020	Gelsolin OS=Mus musculus GN=Gsn PE=1 SV=3 - [GELS_MOUSE]	101.934	3.46	1	2	2	6	780	85.8881	6.17627
	A2	Sequence	# PSMs	# Proteins	# Protein Groups	Protein Group Accessions	Modifications	ΔCn	IonScore	Exp Value	Charge	MH+ [Da]	ΔM [ppm]	RT [min]	# Missed Cleavages
	High	VEKFDLVPVPPNLYGDFFTGDAYVILK	2	1	1	P13020		0	41.12	0.000540876	3	3056.6	0.184175	99.3315	1
	High	FDLVPVPPNLYGDFFTGDAYVILK	4	1	1	P13020		0	34.13	0.00332276	3	2700.4	1.26942	104.497	0
P62962	Profilin-1 OS=Mus musculus GN=Pfn1 PE=1 SV=2 - [PROF1_MOUSE]	96.0588	10	1	1	1	2	140	14.9475	8.27979
	A2	Sequence	# PSMs	# Proteins	# Protein Groups	Protein Group Accessions	Modifications	ΔCn	IonScore	Exp Value	Charge	MH+ [Da]	ΔM [ppm]	RT [min]	# Missed Cleavages
	High	DSLLQDGEFTMDLR	2	1	1	P62962		0	61.44	5.5988e-06	2	1639.76	0.478352	73.6545	0
P62880	Guanine nucleotide-binding protein G(I)/G(S)/G(T) subunit beta-2 OS=Mus musculus GN=Gnb2 PE=1 SV=3 - [GBB2_MOUSE]	89.33	5.29	1	1	1	2	340	37.3071	5.99854
	A2	Sequence	# PSMs	# Proteins	# Protein Groups	Protein Group Accessions	Modifications	ΔCn	IonScore	Exp Value	Charge	MH+ [Da]	ΔM [ppm]	RT [min]	# Missed Cleavages
	High	LLLAGYDDFNcNIWDAMK	2	1	1	P62880	C11(Carbamidomethyl)	0	60.97	6.23871e-06	2	2158.99	-0.350987	86.3102	0
P01942	Hemoglobin subunit alpha OS=Mus musculus GN=Hba PE=1 SV=2 - [HBA_MOUSE]	76.577	10.56	1	1	1	4	142	15.0758	8.22119
	A2	Sequence	# PSMs	# Proteins	# Protein Groups	Protein Group Accessions	Modifications	ΔCn	IonScore	Exp Value	Charge	MH+ [Da]	ΔM [ppm]	RT [min]	# Missed Cleavages
	High	IGGHGAEYGAEALER	4	1	1	P01942		0	32.85	0.00360566	3	1529.73	-1.43158	44.8399	0
Q61704	Inter-alpha-trypsin inhibitor heavy chain H3 OS=Mus musculus GN=Itih3 PE=1 SV=3 - [ITIH3_MOUSE]	73.6412	2.59	1	3	3	8	889	99.2957	6.04932
	A2	Sequence	# PSMs	# Proteins	# Protein Groups	Protein Group Accessions	Modifications	ΔCn	IonScore	Exp Value	Charge	MH+ [Da]	ΔM [ppm]	RT [min]	# Missed Cleavages
	High	EVSFDVELPK	3	1	1	Q61704		0	42.81	0.000599522	2	1162.6	-1.08841	60.7221	0
	Medium	VTFELTYEELLKR	4	1	1	Q61704		0	26.66	0.0189882	3	1640.89	-1.05543	73.3573	1
	Medium	VTFELTYEELLK	1	1	1	Q61704		0	25.78	0.0268204	2	1484.79	-0.962069	78.5253	0
P14069	Protein S100-A6 OS=Mus musculus GN=S100a6 PE=1 SV=3 - [S10A6_MOUSE]	70.583	30.34	1	2	2	4	89	10.0443	5.47803
	A2	Sequence	# PSMs	# Proteins	# Protein Groups	Protein Group Accessions	Modifications	ΔCn	IonScore	Exp Value	Charge	MH+ [Da]	ΔM [ppm]	RT [min]	# Missed Cleavages
	High	DQEVNFQEYVAFLGALALIYNEALK	2	1	1	P14069		0	40.19	0.000741825	3	2858.47	2.71682	117.341	0
	High	NKDQEVNFQEYVAFLGALALIYNEALK	2	1	1	P14069		0	30.03	0.00739871	3	3100.61	4.76145	115.828	1
P50247	Adenosylhomocysteinase OS=Mus musculus GN=Ahcy PE=1 SV=3 - [SAHH_MOUSE]	58.66	2.78	1	1	1	1	432	47.6573	6.53662
	A2	Sequence	# PSMs	# Proteins	# Protein Groups	Protein Group Accessions	Modifications	ΔCn	IonScore	Exp Value	Charge	MH+ [Da]	ΔM [ppm]	RT [min]	# Missed Cleavages
	High	VAVVAGYGDVGK	1	1	1	P50247		0	58.66	1.38187e-05	2	1134.61	-2.69609	39.9109	0
Q8BFR6	AN1-type zinc finger protein 1 OS=Mus musculus GN=Zfand1 PE=1 SV=1 - [ZFAN1_MOUSE]	54.3227	3.36	1	1	1	6	268	30.183	8.104
	A2	Sequence	# PSMs	# Proteins	# Protein Groups	Protein Group Accessions	Modifications	ΔCn	IonScore	Exp Value	Charge	MH+ [Da]	ΔM [ppm]	RT [min]	# Missed Cleavages
	High	MAATQKLVR	6	1	1	Q8BFR6		0	34.02	0.00354669	2	1017.58	-3.33076	52.8345	1
P60710	Actin, cytoplasmic 1 OS=Mus musculus GN=Actb PE=1 SV=1 - [ACTB_MOUSE]	51.0161	15.2	7	3	3	4	375	41.7097	5.47803
	A2	Sequence	# PSMs	# Proteins	# Protein Groups	Protein Group Accessions	Modifications	ΔCn	IonScore	Exp Value	Charge	MH+ [Da]	ΔM [ppm]	RT [min]	# Missed Cleavages
	High	SYELPDGQVITIGNER	1	7	1	P60710		0	44.67	0.000404314	2	1790.89	0.35425	65.0333	0
	Medium	LcYVALDFEQEMATAASSSSLEK	1	2	1	P60710	C2(Carbamidomethyl)	0	24.16	0.0259002	3	2550.17	0.278583	82.6653	0
	Medium	VAPEEHPVLLTEAPLNPK	2	2	1	P60710		0	22.5	0.0337405	3	1954.06	-1.19411	54.9863	0
P29699	Alpha-2-HS-glycoprotein OS=Mus musculus GN=Ahsg PE=1 SV=1 - [FETUA_MOUSE]	50.2239	2.03	1	1	1	2	345	37.3017	6.50732
	A2	Sequence	# PSMs	# Proteins	# Protein Groups	Protein Group Accessions	Modifications	ΔCn	IonScore	Exp Value	Charge	MH+ [Da]	ΔM [ppm]	RT [min]	# Missed Cleavages
	High	cNLLAEK	2	1	1	P29699	C1(Carbamidomethyl)	0	37.65	0.00181239	2	847.433	-1.3727	29.8515	0
Q61703	Inter-alpha-trypsin inhibitor heavy chain H2 OS=Mus musculus GN=Itih2 PE=1 SV=1 - [ITIH2_MOUSE]	48.393	6.24	1	2	3	7	946	105.861	7.26904
	A2	Sequence	# PSMs	# Proteins	# Protein Groups	Protein Group Accessions	Modifications	ΔCn	IonScore	Exp Value	Charge	MH+ [Da]	ΔM [ppm]	RT [min]	# Missed Cleavages
	High	NVQFNYPQASVTDVTQNNFHNYFGGSEIVVAGK	3	1	1	Q61703		0	32.36	0.00635937	3	3644.76	4.857	76.7743	0
	Medium	VQFELHYQEVK	3	1	1	Q61703		0	28.24	0.0180712	3	1419.73	-0.911666	53.1825	0
	Low	IQPSGGTNINEALLR	1	1	1	Q61703		0	20.62	0.0706574	2	1582.85	-0.794815	50.7461	0
P97449	Aminopeptidase N OS=Mus musculus GN=Anpep PE=1 SV=4 - [AMPN_MOUSE]	43.62	2.28	1	1	1	1	966	109.582	5.89697
	A2	Sequence	# PSMs	# Proteins	# Protein Groups	Protein Group Accessions	Modifications	ΔCn	IonScore	Exp Value	Charge	MH+ [Da]	ΔM [ppm]	RT [min]	# Missed Cleavages
	High	WILQMGFPVITVNTNTGEISQK	1	1	1	P97449		0	43.62	0.000423647	3	2476.29	0.267167	86.9279	0
Q8VDN2	Sodium/potassium-transporting ATPase subunit alpha-1 OS=Mus musculus GN=Atp1a1 PE=1 SV=1 - [AT1A1_MOUSE]	43.4667	3.32	5	2	2	3	1023	112.91	5.45264
	A2	Sequence	# PSMs	# Proteins	# Protein Groups	Protein Group Accessions	Modifications	ΔCn	IonScore	Exp Value	Charge	MH+ [Da]	ΔM [ppm]	RT [min]	# Missed Cleavages
	High	LIIVEGcQR	1	5	1	Q8VDN2	C7(Carbamidomethyl)	0	41.11	0.000987439	2	1087.59	-0.517239	38.981	0
	Medium	EQPLDEELKDAFQNAYLELGGLGER	2	1	1	Q8VDN2		0	26.43	0.0243435	3	2834.39	1.98191	101.855	1
P26041	Moesin OS=Mus musculus GN=Msn PE=1 SV=3 - [MOES_MOUSE]	39.66	2.25	1	1	1	1	577	67.7249	6.59521
	A2	Sequence	# PSMs	# Proteins	# Protein Groups	Protein Group Accessions	Modifications	ΔCn	IonScore	Exp Value	Charge	MH+ [Da]	ΔM [ppm]	RT [min]	# Missed Cleavages
	High	EVWFFGLQYQDTK	1	1	1	P26041		0	39.66	0.00101655	2	1660.8	0.186428	79.8576	0
P10852	4F2 cell-surface antigen heavy chain OS=Mus musculus GN=Slc3a2 PE=1 SV=1 - [4F2_MOUSE]	36.5	5.13	1	1	1	2	526	58.3003	5.90967
	A2	Sequence	# PSMs	# Proteins	# Protein Groups	Protein Group Accessions	Modifications	ΔCn	IonScore	Exp Value	Charge	MH+ [Da]	ΔM [ppm]	RT [min]	# Missed Cleavages
	High	EEDTSLKLENLSLNPYEGLLLQFPFVA	2	1	1	P10852		0	36.5	0.00190291	3	3079.59	0.937111	108.83	1
P28665	Murinoglobulin-1 OS=Mus musculus GN=Mug1 PE=1 SV=3 - [MUG1_MOUSE]	36.3	0.54	1	1	1	2	1476	165.193	6.41748
	A2	Sequence	# PSMs	# Proteins	# Protein Groups	Protein Group Accessions	Modifications	ΔCn	IonScore	Exp Value	Charge	MH+ [Da]	ΔM [ppm]	RT [min]	# Missed Cleavages
	High	FQVENSNR	2	1	1	P28665		0	36.3	0.00159408	2	993.474	-0.707223	22.5539	0
P35441	Thrombospondin-1 OS=Mus musculus GN=Thbs1 PE=1 SV=1 - [TSP1_MOUSE]	35.67	2.91	1	1	2	2	1170	129.564	4.95752
	A2	Sequence	# PSMs	# Proteins	# Protein Groups	Protein Group Accessions	Modifications	ΔCn	IonScore	Exp Value	Charge	MH+ [Da]	ΔM [ppm]	RT [min]	# Missed Cleavages
	High	SITLFVQEDR	1	1	1	P35441		0	35.67	0.00317092	2	1207.63	-0.724001	56.331	0
	Low	IRLcNSPSPQMNGKPCEGEARETK	1	1	1	P35441	C4(Carbamidomethyl)	0	10.24	0.91785	3	2702.27	-2.41617	81.8203	2
Q04857	Collagen alpha-1(VI) chain OS=Mus musculus GN=Col6a1 PE=2 SV=1 - [CO6A1_MOUSE]	34.38	1.46	1	1	2	2	1025	108.422	5.36377
	A2	Sequence	# PSMs	# Proteins	# Protein Groups	Protein Group Accessions	Modifications	ΔCn	IonScore	Exp Value	Charge	MH+ [Da]	ΔM [ppm]	RT [min]	# Missed Cleavages
	High	IALVITDGR	1	1	1	Q04857		0	34.38	0.0031916	2	957.57	-2.68729	47.915	0
	Low	FIDNLR	1	1	1	Q04857		0.2381	16.18	0.308468	2	777.425	-1.02023	34.9903	0
P26039	Talin-1 OS=Mus musculus GN=Tln1 PE=1 SV=2 - [TLN1_MOUSE]	32.77	1.18	1	1	1	1	2541	269.653	6.17627
	A2	Sequence	# PSMs	# Proteins	# Protein Groups	Protein Group Accessions	Modifications	ΔCn	IonScore	Exp Value	Charge	MH+ [Da]	ΔM [ppm]	RT [min]	# Missed Cleavages
	High	GTEWVDPEDPTVIAENELLGAAAAIEAAAK	1	1	1	P26039		0	32.77	0.0050995	3	3051.51	-0.452829	109.734	0
Q9D1H6	NADH dehydrogenase [ubiquinone] 1 alpha subcomplex assembly factor 4 OS=Mus musculus GN=Ndufaf4 PE=2 SV=1 - [NDUF4_MOUSE]	32.3607	4.05	1	1	1	3	173	20.0698	9.39307
	A2	Sequence	# PSMs	# Proteins	# Protein Groups	Protein Group Accessions	Modifications	ΔCn	IonScore	Exp Value	Charge	MH+ [Da]	ΔM [ppm]	RT [min]	# Missed Cleavages
	High	KPSMAPK	3	1	1	Q9D1H6		0	31.92	0.00825854	2	758.422	-1.06083	32.8525	0
P01027	Complement C3 OS=Mus musculus GN=C3 PE=1 SV=3 - [CO3_MOUSE]	32.2	0.72	1	1	1	1	1663	186.366	6.72705
	A2	Sequence	# PSMs	# Proteins	# Protein Groups	Protein Group Accessions	Modifications	ΔCn	IonScore	Exp Value	Charge	MH+ [Da]	ΔM [ppm]	RT [min]	# Missed Cleavages
	High	EVVADSVWVDVK	1	1	1	P01027		0	32.2	0.00750187	2	1345.7	-0.72911	60.2832	0
Q6GQT1	Alpha-2-macroglobulin-P OS=Mus musculus GN=A2mp PE=2 SV=2 - [A2MP_MOUSE]	28.61	0.95	1	1	1	3	1474	164.248	6.60986
	A2	Sequence	# PSMs	# Proteins	# Protein Groups	Protein Group Accessions	Modifications	ΔCn	IonScore	Exp Value	Charge	MH+ [Da]	ΔM [ppm]	RT [min]	# Missed Cleavages
	Medium	TEVSNNHVLIYLDK	3	1	1	Q6GQT1		0	28.61	0.014323	3	1644.86	-1.17845	54.0185	0
Q8BWQ4	FtsJ methyltransferase domain-containing protein 1 OS=Mus musculus GN=Ftsjd1 PE=2 SV=1 - [FTSJ1_MOUSE]	28.5048	1.17	1	1	1	2	767	87.0857	7.07861
	A2	Sequence	# PSMs	# Proteins	# Protein Groups	Protein Group Accessions	Modifications	ΔCn	IonScore	Exp Value	Charge	MH+ [Da]	ΔM [ppm]	RT [min]	# Missed Cleavages
	Medium	KMMETLSWK	2	1	1	Q8BWQ4		0	22.23	0.0484713	2	1153.57	-1.45617	41.5148	1
P00342	L-lactate dehydrogenase C chain OS=Mus musculus GN=Ldhc PE=1 SV=2 - [LDHC_MOUSE]	25.39	2.71	2	1	1	1	332	35.8891	8.20654
	A2	Sequence	# PSMs	# Proteins	# Protein Groups	Protein Group Accessions	Modifications	ΔCn	IonScore	Exp Value	Charge	MH+ [Da]	ΔM [ppm]	RT [min]	# Missed Cleavages
	High	LVIITAGAR	1	2	1	P00342		0	25.39	0.00476962	2	913.583	-0.252921	43.0712	0
Q9Z1P8	Angiopoietin-related protein 4 OS=Mus musculus GN=Angptl4 PE=2 SV=1 - [ANGL4_MOUSE]	24.9	3.9	1	1	1	2	410	45.5098	8.1333
	A2	Sequence	# PSMs	# Proteins	# Protein Groups	Protein Group Accessions	Modifications	ΔCn	IonScore	Exp Value	Charge	MH+ [Da]	ΔM [ppm]	RT [min]	# Missed Cleavages
	Medium	DGFGDPQGEFWLGLEK	2	1	1	Q9Z1P8		0	24.9	0.0257257	2	1794.84	1.14524	68.2357	0
Q69ZQ2	Pre-mRNA-splicing factor ISY1 homolog OS=Mus musculus GN=Isy1 PE=1 SV=2 - [ISY1_MOUSE]	24.65	2.11	1	1	1	4	285	32.9689	5.17334
	A2	Sequence	# PSMs	# Proteins	# Protein Groups	Protein Group Accessions	Modifications	ΔCn	IonScore	Exp Value	Charge	MH+ [Da]	ΔM [ppm]	RT [min]	# Missed Cleavages
	Medium	mELLQK	4	1	1	Q69ZQ2	M1(Oxidation)	0	24.65	0.0459309	2	777.425	9.55469	36.0184	0
P97477	Aurora kinase A OS=Mus musculus GN=Aurka PE=1 SV=1 - [AURKA_MOUSE]	23.69	2.28	1	1	1	7	395	44.7442	9.37842
	A2	Sequence	# PSMs	# Proteins	# Protein Groups	Protein Group Accessions	Modifications	ΔCn	IonScore	Exp Value	Charge	MH+ [Da]	ΔM [ppm]	RT [min]	# Missed Cleavages
	Medium	TTVPFGPKR	7	1	1	P97477		0	23.69	0.0329223	2	1002.58	9.64506	48.1504	1
P41216	Long-chain-fatty-acid--CoA ligase 1 OS=Mus musculus GN=Acsl1 PE=1 SV=2 - [ACSL1_MOUSE]	23.11	2.43	1	1	1	8	699	77.9014	7.15186
	A2	Sequence	# PSMs	# Proteins	# Protein Groups	Protein Group Accessions	Modifications	ΔCn	IonScore	Exp Value	Charge	MH+ [Da]	ΔM [ppm]	RT [min]	# Missed Cleavages
	Medium	KcGVEIISLKALEDLGR	8	1	1	P41216	C2(Carbamidomethyl)	0	23.11	0.0312738	2	1901.04	-7.71994	79.9632	2
O88888	Amyloid beta A4 precursor protein-binding family A member 3 OS=Mus musculus GN=Apba3 PE=1 SV=1 - [APBA3_MOUSE]	22.14	2.1	1	1	1	1	571	60.6795	5.08447
	A2	Sequence	# PSMs	# Proteins	# Protein Groups	Protein Group Accessions	Modifications	ΔCn	IonScore	Exp Value	Charge	MH+ [Da]	ΔM [ppm]	RT [min]	# Missed Cleavages
	Medium	MGQAQEAmDRVK	1	1	1	O88888	M8(Oxidation)	0	22.14	0.0397112	2	1379.63	-5.31875	74.182	1
P41139	DNA-binding protein inhibitor ID-4 OS=Mus musculus GN=Id4 PE=1 SV=1 - [ID4_MOUSE]	20.94	29.81	1	1	1	1	161	16.5856	8.32373
	A2	Sequence	# PSMs	# Proteins	# Protein Groups	Protein Group Accessions	Modifications	ΔCn	IonScore	Exp Value	Charge	MH+ [Da]	ΔM [ppm]	RT [min]	# Missed Cleavages
	Medium	cLAEHGHSLGGSAAAAAAAAAARCKAAEAAADEPALCLQCDMNDCYSR	1	1	1	P41139	C1(Carbamidomethyl)	0	20.94	0.0285909	4	4763.14	9.33158	86.7863	2

## Sheet: Summary
Table S1
Non-Infected Cell EV MS data
Accession	Description	Score	Coverage	# Proteins	# Unique Peptides	# Peptides	# PSMs	# AAs	MW [kDa]	calc. pI
P20029	78 kDa glucose-regulated protein OS=Mus musculus GN=Hspa5 PE=1 SV=3 - [GRP78_MOUSE]	562.316	9.31	1	2	2	18	655	72.3775	5.16064
	A2	Sequence	# PSMs	# Proteins	# Protein Groups	Protein Group Accessions	Modifications	ΔCn	IonScore	Exp Value
	High	IEIESFFEGEDFSETLTR	5	1	1	P20029		0	92.26	4.72462e-09
		Accession	Description	Score	Coverage	# Proteins	# Unique Peptides	# Peptides	# PSMs	# AAs
		P20029	78 kDa glucose-regulated protein OS=Mus musculus GN=Hspa5 PE=1 SV=3 - [GRP78_MOUSE]	562.316	9.31	1	2	2	18	655
	High	NILVFDLGGGTFDVSLLTIDNGVFEVVATNGDTHLGGEDFDQR	13	1	1	P20029		0	70.78	5.4732e-07
		Accession	Description	Score	Coverage	# Proteins	# Unique Peptides	# Peptides	# PSMs	# AAs
		P20029	78 kDa glucose-regulated protein OS=Mus musculus GN=Hspa5 PE=1 SV=3 - [GRP78_MOUSE]	562.316	9.31	1	2	2	18	655
P07724	Serum albumin OS=Mus musculus GN=Alb PE=1 SV=3 - [ALBU_MOUSE]	459.168	4.44	1	2	2	16	608	68.6477	6.07471
	A2	Sequence	# PSMs	# Proteins	# Protein Groups	Protein Group Accessions	Modifications	ΔCn	IonScore	Exp Value
	High	LGEYGFQNAILVR	13	1	1	P07724		0	41.3	0.000789495
		Accession	Description	Score	Coverage	# Proteins	# Unique Peptides	# Peptides	# PSMs	# AAs
		P07724	Serum albumin OS=Mus musculus GN=Alb PE=1 SV=3 - [ALBU_MOUSE]	459.168	4.44	1	2	2	16	608
	High	EccHGDLLEcADDR	3	1	1	P07724	C2(Carbamidomethyl); C3(Carbamidomethyl); C10(Carbamidomethyl)	0	32.11	0.00061372
		Accession	Description	Score	Coverage	# Proteins	# Unique Peptides	# Peptides	# PSMs	# AAs
		P07724	Serum albumin OS=Mus musculus GN=Alb PE=1 SV=3 - [ALBU_MOUSE]	459.168	4.44	1	2	2	16	608
P19221	Prothrombin OS=Mus musculus GN=F2 PE=1 SV=1 - [THRB_MOUSE]	355.018	2.43	1	1	1	7	618	70.2237	6.43018
	A2	Sequence	# PSMs	# Proteins	# Protein Groups	Protein Group Accessions	Modifications	ΔCn	IonScore	Exp Value
	High	WYQMGIVSWGEGcDR	7	1	1	P19221	C13(Carbamidomethyl)	0	76.71	6.9324e-08
		Accession	Description	Score	Coverage	# Proteins	# Unique Peptides	# Peptides	# PSMs	# AAs
		P19221	Prothrombin OS=Mus musculus GN=F2 PE=1 SV=1 - [THRB_MOUSE]	355.018	2.43	1	1	1	7	618
P01942	Hemoglobin subunit alpha OS=Mus musculus GN=Hba PE=1 SV=2 - [HBA_MOUSE]	152.873	16.9	1	2	2	8	142	15.0758	8.22119
	A2	Sequence	# PSMs	# Proteins	# Protein Groups	Protein Group Accessions	Modifications	ΔCn	IonScore	Exp Value
	High	IGGHGAEYGAEALER	6	1	1	P01942		0	46.91	0.000140556
		Accession	Description	Score	Coverage	# Proteins	# Unique Peptides	# Peptides	# PSMs	# AAs
		P01942	Hemoglobin subunit alpha OS=Mus musculus GN=Hba PE=1 SV=2 - [HBA_MOUSE]	152.873	16.9	1	2	2	8	142
	High	MFASFPTTK	2	1	1	P01942		0	27.6	0.0104268
		Accession	Description	Score	Coverage	# Proteins	# Unique Peptides	# Peptides	# PSMs	# AAs
		P01942	Hemoglobin subunit alpha OS=Mus musculus GN=Hba PE=1 SV=2 - [HBA_MOUSE]	152.873	16.9	1	2	2	8	142
P17156	Heat shock-related 70 kDa protein 2 OS=Mus musculus GN=Hspa2 PE=1 SV=2 - [HSP72_MOUSE]	100.82	4.27	2	1	1	5	633	69.5987	5.66846
	A2	Sequence	# PSMs	# Proteins	# Protein Groups	Protein Group Accessions	Modifications	ΔCn	IonScore	Exp Value
	High	NVLIFDLGGGTFDVSILTIEDGIFEVK	5	2	1	P17156		0	40.36	0.000616701
		Accession	Description	Score	Coverage	# Proteins	# Unique Peptides	# Peptides	# PSMs	# AAs
		P17156	Heat shock-related 70 kDa protein 2 OS=Mus musculus GN=Hspa2 PE=1 SV=2 - [HSP72_MOUSE]	100.82	4.27	2	1	1	5	633
Q61703	Inter-alpha-trypsin inhibitor heavy chain H2 OS=Mus musculus GN=Itih2 PE=1 SV=1 - [ITIH2_MOUSE]	94.748	2.75	1	2	2	8	946	105.861	7.26904
	A2	Sequence	# PSMs	# Proteins	# Protein Groups	Protein Group Accessions	Modifications	ΔCn	IonScore	Exp Value
	High	IQPSGGTNINEALLR	2	1	1	Q61703		0	39.37	0.00104628
		Accession	Description	Score	Coverage	# Proteins	# Unique Peptides	# Peptides	# PSMs	# AAs
		Q61703	Inter-alpha-trypsin inhibitor heavy chain H2 OS=Mus musculus GN=Itih2 PE=1 SV=1 - [ITIH2_MOUSE]	94.748	2.75	1	2	2	8	946
	High	VQFELHYQEVK	6	1	1	Q61703		0	33.17	0.00575928
		Accession	Description	Score	Coverage	# Proteins	# Unique Peptides	# Peptides	# PSMs	# AAs
		Q61703	Inter-alpha-trypsin inhibitor heavy chain H2 OS=Mus musculus GN=Itih2 PE=1 SV=1 - [ITIH2_MOUSE]	94.748	2.75	1	2	2	8	946
P13020	Gelsolin OS=Mus musculus GN=Gsn PE=1 SV=3 - [GELS_MOUSE]	89.4577	3.46	1	1	2	4	780	85.8881	6.17627
	A2	Sequence	# PSMs	# Proteins	# Protein Groups	Protein Group Accessions	Modifications	ΔCn	IonScore	Exp Value
	High	FDLVPVPPNLYGDFFTGDAYVILK	3	1	1	P13020		0	46.35	0.000196979
		Accession	Description	Score	Coverage	# Proteins	# Unique Peptides	# Peptides	# PSMs	# AAs
		P13020	Gelsolin OS=Mus musculus GN=Gsn PE=1 SV=3 - [GELS_MOUSE]	89.4577	3.46	1	1	2	4	780
	Low	VEKFDLVPVPPNLYGDFFTGDAYVILK	1	1	1	P13020		0	15.55	0.171346
		Accession	Description	Score	Coverage	# Proteins	# Unique Peptides	# Peptides	# PSMs	# AAs
		P13020	Gelsolin OS=Mus musculus GN=Gsn PE=1 SV=3 - [GELS_MOUSE]	89.4577	3.46	1	1	2	4	780
P01027	Complement C3 OS=Mus musculus GN=C3 PE=1 SV=3 - [CO3_MOUSE]	81.8449	1.38	1	1	2	4	1663	186.366	6.72705
	A2	Sequence	# PSMs	# Proteins	# Protein Groups	Protein Group Accessions	Modifications	ΔCn	IonScore	Exp Value
	High	EVVADSVWVDVK	3	1	1	P01027		0	54.77	3.81773e-05
		Accession	Description	Score	Coverage	# Proteins	# Unique Peptides	# Peptides	# PSMs	# AAs
		P01027	Complement C3 OS=Mus musculus GN=C3 PE=1 SV=3 - [CO3_MOUSE]	81.8449	1.38	1	1	2	4	1663
	Low	AcEPGVDYVYK	1	1	1	P01027	C2(Carbamidomethyl)	0	16.48	0.0798414
		Accession	Description	Score	Coverage	# Proteins	# Unique Peptides	# Peptides	# PSMs	# AAs
		P01027	Complement C3 OS=Mus musculus GN=C3 PE=1 SV=3 - [CO3_MOUSE]	81.8449	1.38	1	1	2	4	1663
Q61704	Inter-alpha-trypsin inhibitor heavy chain H3 OS=Mus musculus GN=Itih3 PE=1 SV=3 - [ITIH3_MOUSE]	81.4629	2.59	1	3	3	9	889	99.2957	6.04932
	A2	Sequence	# PSMs	# Proteins	# Protein Groups	Protein Group Accessions	Modifications	ΔCn	IonScore	Exp Value
	High	VTFELTYEELLK	2	1	1	Q61704		0	37.49	0.00184476
		Accession	Description	Score	Coverage	# Proteins	# Unique Peptides	# Peptides	# PSMs	# AAs
		Q61704	Inter-alpha-trypsin inhibitor heavy chain H3 OS=Mus musculus GN=Itih3 PE=1 SV=3 - [ITIH3_MOUSE]	81.4629	2.59	1	3	3	9	889
	High	EVSFDVELPK	3	1	1	Q61704		0	30.56	0.00997691
		Accession	Description	Score	Coverage	# Proteins	# Unique Peptides	# Peptides	# PSMs	# AAs
		Q61704	Inter-alpha-trypsin inhibitor heavy chain H3 OS=Mus musculus GN=Itih3 PE=1 SV=3 - [ITIH3_MOUSE]	81.4629	2.59	1	3	3	9	889
	Medium	VTFELTYEELLKR	4	1	1	Q61704		0	26.67	0.0189445
		Accession	Description	Score	Coverage	# Proteins	# Unique Peptides	# Peptides	# PSMs	# AAs
		Q61704	Inter-alpha-trypsin inhibitor heavy chain H3 OS=Mus musculus GN=Itih3 PE=1 SV=3 - [ITIH3_MOUSE]	81.4629	2.59	1	3	3	9	889
P29699	Alpha-2-HS-glycoprotein OS=Mus musculus GN=Ahsg PE=1 SV=1 - [FETUA_MOUSE]	81.3209	2.03	1	1	1	4	345	37.3017	6.50732
	A2	Sequence	# PSMs	# Proteins	# Protein Groups	Protein Group Accessions	Modifications	ΔCn	IonScore	Exp Value
	High	cNLLAEK	4	1	1	P29699	C1(Carbamidomethyl)	0	49.73	0.000112799
		Accession	Description	Score	Coverage	# Proteins	# Unique Peptides	# Peptides	# PSMs	# AAs
		P29699	Alpha-2-HS-glycoprotein OS=Mus musculus GN=Ahsg PE=1 SV=1 - [FETUA_MOUSE]	81.3209	2.03	1	1	1	4	345
P60710	Actin, cytoplasmic 1 OS=Mus musculus GN=Actb PE=1 SV=1 - [ACTB_MOUSE]	69.6817	15.2	7	2	3	6	375	41.7097	5.47803
	A2	Sequence	# PSMs	# Proteins	# Protein Groups	Protein Group Accessions	Modifications	ΔCn	IonScore	Exp Value
	High	SYELPDGQVITIGNER	1	7	1	P60710		0	37.93	0.00190056
		Accession	Description	Score	Coverage	# Proteins	# Unique Peptides	# Peptides	# PSMs	# AAs
		P60710	Actin, cytoplasmic 1 OS=Mus musculus GN=Actb PE=1 SV=1 - [ACTB_MOUSE]	69.6817	15.2	7	2	3	6	375
	High	LcYVALDFEQEMATAASSSSLEK	3	2	1	P60710	C2(Carbamidomethyl)	0	34.03	0.00260942
		Accession	Description	Score	Coverage	# Proteins	# Unique Peptides	# Peptides	# PSMs	# AAs
		P60710	Actin, cytoplasmic 1 OS=Mus musculus GN=Actb PE=1 SV=1 - [ACTB_MOUSE]	69.6817	15.2	7	2	3	6	375
	Low	VAPEEHPVLLTEAPLNPK	2	2	1	P60710		0	12.8	0.31226
		Accession	Description	Score	Coverage	# Proteins	# Unique Peptides	# Peptides	# PSMs	# AAs
		P60710	Actin, cytoplasmic 1 OS=Mus musculus GN=Actb PE=1 SV=1 - [ACTB_MOUSE]	69.6817	15.2	7	2	3	6	375
P63082	V-type proton ATPase 16 kDa proteolipid subunit OS=Mus musculus GN=Atp6v0c PE=2 SV=1 - [VATL_MOUSE]	61.25	18.71	1	1	1	1	155	15.7975	9.12939
	A2	Sequence	# PSMs	# Proteins	# Protein Groups	Protein Group Accessions	Modifications	ΔCn	IonScore	Exp Value
	High	LFVGmILILIFAEVLGLYGLIVALILSTK	1	1	1	P63082	M5(Oxidation)	0	61.25	7.48118e-07
		Accession	Description	Score	Coverage	# Proteins	# Unique Peptides	# Peptides	# PSMs	# AAs
		P63082	V-type proton ATPase 16 kDa proteolipid subunit OS=Mus musculus GN=Atp6v0c PE=2 SV=1 - [VATL_MOUSE]	61.25	18.71	1	1	1	1	155
P62962	Profilin-1 OS=Mus musculus GN=Pfn1 PE=1 SV=2 - [PROF1_MOUSE]	57.85	10	1	1	1	1	140	14.9475	8.27979
	A2	Sequence	# PSMs	# Proteins	# Protein Groups	Protein Group Accessions	Modifications	ΔCn	IonScore	Exp Value
	High	DSLLQDGEFTMDLR	1	1	1	P62962		0	57.85	1.27966e-05
		Accession	Description	Score	Coverage	# Proteins	# Unique Peptides	# Peptides	# PSMs	# AAs
		P62962	Profilin-1 OS=Mus musculus GN=Pfn1 PE=1 SV=2 - [PROF1_MOUSE]	57.85	10	1	1	1	1	140
Q8BFR6	AN1-type zinc finger protein 1 OS=Mus musculus GN=Zfand1 PE=1 SV=1 - [ZFAN1_MOUSE]	52.9741	3.36	1	1	1	5	268	30.183	8.104
	A2	Sequence	# PSMs	# Proteins	# Protein Groups	Protein Group Accessions	Modifications	ΔCn	IonScore	Exp Value
	High	MAATQKLVR	5	1	1	Q8BFR6		0	32.38	0.00471148
		Accession	Description	Score	Coverage	# Proteins	# Unique Peptides	# Peptides	# PSMs	# AAs
		Q8BFR6	AN1-type zinc finger protein 1 OS=Mus musculus GN=Zfand1 PE=1 SV=1 - [ZFAN1_MOUSE]	52.9741	3.36	1	1	1	5	268
P14069	Protein S100-A6 OS=Mus musculus GN=S100a6 PE=1 SV=3 - [S10A6_MOUSE]	41.62	30.34	1	1	1	2	89	10.0443	5.47803
	A2	Sequence	# PSMs	# Proteins	# Protein Groups	Protein Group Accessions	Modifications	ΔCn	IonScore	Exp Value
	High	NKDQEVNFQEYVAFLGALALIYNEALK	2	1	1	P14069		0	32.46	0.00456873
		Accession	Description	Score	Coverage	# Proteins	# Unique Peptides	# Peptides	# PSMs	# AAs
		P14069	Protein S100-A6 OS=Mus musculus GN=S100a6 PE=1 SV=3 - [S10A6_MOUSE]	41.62	30.34	1	1	1	2	89
P28665	Murinoglobulin-1 OS=Mus musculus GN=Mug1 PE=1 SV=3 - [MUG1_MOUSE]	41.2	0.54	1	1	1	2	1476	165.193	6.41748
	A2	Sequence	# PSMs	# Proteins	# Protein Groups	Protein Group Accessions	Modifications	ΔCn	IonScore	Exp Value
	High	FQVENSNR	2	1	1	P28665		0	41.2	0.00051204
		Accession	Description	Score	Coverage	# Proteins	# Unique Peptides	# Peptides	# PSMs	# AAs
		P28665	Murinoglobulin-1 OS=Mus musculus GN=Mug1 PE=1 SV=3 - [MUG1_MOUSE]	41.2	0.54	1	1	1	2	1476
Q9D1H6	NADH dehydrogenase [ubiquinone] 1 alpha subcomplex assembly factor 4 OS=Mus musculus GN=Ndufaf4 PE=2 SV=1 - [NDUF4_MOUSE]	35.5807	4.05	1	1	1	4	173	20.0698	9.39307
	A2	Sequence	# PSMs	# Proteins	# Protein Groups	Protein Group Accessions	Modifications	ΔCn	IonScore	Exp Value
	Medium	KPSMAPK	4	1	1	Q9D1H6		0	29.37	0.014856
		Accession	Description	Score	Coverage	# Proteins	# Unique Peptides	# Peptides	# PSMs	# AAs
		Q9D1H6	NADH dehydrogenase [ubiquinone] 1 alpha subcomplex assembly factor 4 OS=Mus musculus GN=Ndufaf4 PE=2 SV=1 - [NDUF4_MOUSE]	35.5807	4.05	1	1	1	4	173
P50247	Adenosylhomocysteinase OS=Mus musculus GN=Ahcy PE=1 SV=3 - [SAHH_MOUSE]	34.34	2.78	1	1	1	1	432	47.6573	6.53662
	A2	Sequence	# PSMs	# Proteins	# Protein Groups	Protein Group Accessions	Modifications	ΔCn	IonScore	Exp Value
	High	VAVVAGYGDVGK	1	1	1	P50247		0	34.34	0.00377332
		Accession	Description	Score	Coverage	# Proteins	# Unique Peptides	# Peptides	# PSMs	# AAs
		P50247	Adenosylhomocysteinase OS=Mus musculus GN=Ahcy PE=1 SV=3 - [SAHH_MOUSE]	34.34	2.78	1	1	1	1	432
P84244	Histone H3.3 OS=Mus musculus GN=H3f3a PE=1 SV=2 - [H33_MOUSE]	32.24	23.53	1	1	1	1	136	15.3185	11.2681
	A2	Sequence	# PSMs	# Proteins	# Protein Groups	Protein Group Accessions	Modifications	ΔCn	IonScore	Exp Value
	High	FQSAAIGALQEASEAYLVGLFEDTNLcAIHAK	1	1	1	P84244	C27(Carbamidomethyl)	0	32.24	0.00662709
		Accession	Description	Score	Coverage	# Proteins	# Unique Peptides	# Peptides	# PSMs	# AAs
		P84244	Histone H3.3 OS=Mus musculus GN=H3f3a PE=1 SV=2 - [H33_MOUSE]	32.24	23.53	1	1	1	1	136
Q61329	Zinc finger homeobox protein 3 OS=Mus musculus GN=Zfhx3 PE=1 SV=1 - [ZFHX3_MOUSE]	27.82	1.02	1	1	2	12	3726	406.315	6.23975
	A2	Sequence	# PSMs	# Proteins	# Protein Groups	Protein Group Accessions	Modifications	ΔCn	IonScore	Exp Value
	Medium	AEQGGESLEKLEcDSCGKLFSNILILK	10	1	1	Q61329	C13(Carbamidomethyl)	0	27.82	0.0155284
		Accession	Description	Score	Coverage	# Proteins	# Unique Peptides	# Peptides	# PSMs	# AAs
		Q61329	Zinc finger homeobox protein 3 OS=Mus musculus GN=Zfhx3 PE=1 SV=1 - [ZFHX3_MOUSE]	27.82	1.02	1	1	2	12	3726
	Low	EGGKANEWRLK	2	1	1	Q61329		0.4118	10.18	1.07453
		Accession	Description	Score	Coverage	# Proteins	# Unique Peptides	# Peptides	# PSMs	# AAs
		Q61329	Zinc finger homeobox protein 3 OS=Mus musculus GN=Zfhx3 PE=1 SV=1 - [ZFHX3_MOUSE]	27.82	1.02	1	1	2	12	3726
Q6IFZ9	Keratin, type II cytoskeletal 74 OS=Mus musculus GN=Krt74 PE=2 SV=1 - [K2C74_MOUSE]	27.75	2.42	5	1	1	1	495	54.7123	5.71924
	A2	Sequence	# PSMs	# Proteins	# Protein Groups	Protein Group Accessions	Modifications	ΔCn	IonScore	Exp Value
	Medium	FLEQQNQVLQTK	1	5	1	Q6IFZ9		0	27.75	0.0199778
		Accession	Description	Score	Coverage	# Proteins	# Unique Peptides	# Peptides	# PSMs	# AAs
		Q6IFZ9	Keratin, type II cytoskeletal 74 OS=Mus musculus GN=Krt74 PE=2 SV=1 - [K2C74_MOUSE]	27.75	2.42	5	1	1	1	495
Q9JK45	Potassium voltage-gated channel subfamily KQT member 5 OS=Mus musculus GN=Kcnq5 PE=1 SV=2 - [KCNQ5_MOUSE]	24.93	0.86	1	1	1	3	933	102.194	9.49561
	A2	Sequence	# PSMs	# Proteins	# Protein Groups	Protein Group Accessions	Modifications	ΔCn	IonScore	Exp Value
	Medium	SASANISR	3	1	1	Q9JK45		0	24.93	0.0451519
		Accession	Description	Score	Coverage	# Proteins	# Unique Peptides	# Peptides	# PSMs	# AAs
		Q9JK45	Potassium voltage-gated channel subfamily KQT member 5 OS=Mus musculus GN=Kcnq5 PE=1 SV=2 - [KCNQ5_MOUSE]	24.93	0.86	1	1	1	3	933
Q8BLN6	Protein unc-80 homolog OS=Mus musculus GN=Unc80 PE=1 SV=2 - [UNC80_MOUSE]	24.93	0.34	1	1	1	3	3261	363.275	6.88818
	A2	Sequence	# PSMs	# Proteins	# Protein Groups	Protein Group Accessions	Modifications	ΔCn	IonScore	Exp Value
	High	SSEGQEQDGGR	3	1	1	Q8BLN6		0	23.16	0.00481915
		Accession	Description	Score	Coverage	# Proteins	# Unique Peptides	# Peptides	# PSMs	# AAs
		Q8BLN6	Protein unc-80 homolog OS=Mus musculus GN=Unc80 PE=1 SV=2 - [UNC80_MOUSE]	24.93	0.34	1	1	1	3	3261
P14211	Calreticulin OS=Mus musculus GN=Calr PE=1 SV=1 - [CALR_MOUSE]	24.65	6.97	1	1	1	1	416	47.9649	4.48779
	A2	Sequence	# PSMs	# Proteins	# Protein Groups	Protein Group Accessions	Modifications	ΔCn	IonScore	Exp Value
	Medium	SGTIFDNFLITNDEAYAEEFGNETWGVTK	1	1	1	P14211		0	24.65	0.021423
		Accession	Description	Score	Coverage	# Proteins	# Unique Peptides	# Peptides	# PSMs	# AAs
		P14211	Calreticulin OS=Mus musculus GN=Calr PE=1 SV=1 - [CALR_MOUSE]	24.65	6.97	1	1	1	1	416
Q8BWQ4	FtsJ methyltransferase domain-containing protein 1 OS=Mus musculus GN=Ftsjd1 PE=2 SV=1 - [FTSJ1_MOUSE]	24.56	1.17	1	1	1	4	767	87.0857	7.07861
	A2	Sequence	# PSMs	# Proteins	# Protein Groups	Protein Group Accessions	Modifications	ΔCn	IonScore	Exp Value
	Medium	KMMETLSWK	4	1	1	Q8BWQ4		0	24.56	0.0285205
		Accession	Description	Score	Coverage	# Proteins	# Unique Peptides	# Peptides	# PSMs	# AAs
		Q8BWQ4	FtsJ methyltransferase domain-containing protein 1 OS=Mus musculus GN=Ftsjd1 PE=2 SV=1 - [FTSJ1_MOUSE]	24.56	1.17	1	1	1	4	767
Q6GQT1	Alpha-2-macroglobulin-P OS=Mus musculus GN=A2mp PE=2 SV=2 - [A2MP_MOUSE]	23.9	2.37	1	2	3	4	1474	164.248	6.60986
	A2	Sequence	# PSMs	# Proteins	# Protein Groups	Protein Group Accessions	Modifications	ΔCn	IonScore	Exp Value
	Medium	TEVSNNHVLIYLDK	2	1	1	Q6GQT1		0	23.48	0.0477914
		Accession	Description	Score	Coverage	# Proteins	# Unique Peptides	# Peptides	# PSMs	# AAs
		Q6GQT1	Alpha-2-macroglobulin-P OS=Mus musculus GN=A2mp PE=2 SV=2 - [A2MP_MOUSE]	23.9	2.37	1	2	3	4	1474
	Low	MVSGFIPLKPTVK	1	1	1	Q6GQT1		0	17.92	0.0548882
		Accession	Description	Score	Coverage	# Proteins	# Unique Peptides	# Peptides	# PSMs	# AAs
		Q6GQT1	Alpha-2-macroglobulin-P OS=Mus musculus GN=A2mp PE=2 SV=2 - [A2MP_MOUSE]	23.9	2.37	1	2	3	4	1474
	Medium	DLKPAIVK	1	1	1	Q6GQT1		0	13.94	0.0504557
		Accession	Description	Score	Coverage	# Proteins	# Unique Peptides	# Peptides	# PSMs	# AAs
		Q6GQT1	Alpha-2-macroglobulin-P OS=Mus musculus GN=A2mp PE=2 SV=2 - [A2MP_MOUSE]	23.9	2.37	1	2	3	4	1474
Q80U28	MAP kinase-activating death domain protein OS=Mus musculus GN=Madd PE=1 SV=2 - [MADD_MOUSE]	23.84	0.63	1	1	1	3	1577	175.07	6.03662
	A2	Sequence	# PSMs	# Proteins	# Protein Groups	Protein Group Accessions	Modifications	ΔCn	IonScore	Exp Value
	Medium	SPVPVSGQKR	3	1	1	Q80U28		0	23.84	0.0214785
		Accession	Description	Score	Coverage	# Proteins	# Unique Peptides	# Peptides	# PSMs	# AAs
		Q80U28	MAP kinase-activating death domain protein OS=Mus musculus GN=Madd PE=1 SV=2 - [MADD_MOUSE]	23.84	0.63	1	1	1	3	1577
P10126	Elongation factor 1-alpha 1 OS=Mus musculus GN=Eef1a1 PE=1 SV=3 - [EF1A1_MOUSE]	22.72	6.93	1	1	1	1	462	50.0821	9.01221
	A2	Sequence	# PSMs	# Proteins	# Protein Groups	Protein Group Accessions	Modifications	ΔCn	IonScore	Exp Value
	Medium	IGYNPDTVAFVPISGWNGDNMLEPSANMPWFK	1	1	1	P10126		0	22.72	0.0344794
		Accession	Description	Score	Coverage	# Proteins	# Unique Peptides	# Peptides	# PSMs	# AAs
		P10126	Elongation factor 1-alpha 1 OS=Mus musculus GN=Eef1a1 PE=1 SV=3 - [EF1A1_MOUSE]	22.72	6.93	1	1	1	1	462
P97477	Aurora kinase A OS=Mus musculus GN=Aurka PE=1 SV=1 - [AURKA_MOUSE]	22.01	2.28	1	1	1	6	395	44.7442	9.37842
	A2	Sequence	# PSMs	# Proteins	# Protein Groups	Protein Group Accessions	Modifications	ΔCn	IonScore	Exp Value
	Medium	TTVPFGPKR	6	1	1	P97477		0	22.01	0.048472
		Accession	Description	Score	Coverage	# Proteins	# Unique Peptides	# Peptides	# PSMs	# AAs
		P97477	Aurora kinase A OS=Mus musculus GN=Aurka PE=1 SV=1 - [AURKA_MOUSE]	22.01	2.28	1	1	1	6	395
O35955	Proteasome subunit beta type-10 OS=Mus musculus GN=Psmb10 PE=1 SV=1 - [PSB10_MOUSE]	21.83	15.75	1	1	1	1	273	29.045	6.87354
Infected Cell EV MS data
Accession	Description	Score	Coverage	# Proteins	# Unique Peptides	# Peptides	# PSMs	# AAs	MW [kDa]	calc. pI
P07724	Serum albumin OS=Mus musculus GN=Alb PE=1 SV=3 - [ALBU_MOUSE]	443.575	5.59	1	2	3	14	608	68.6477	6.07471
	A2	Sequence	# PSMs	# Proteins	# Protein Groups	Protein Group Accessions	Modifications	ΔCn	IonScore	Exp Value
	High	LGEYGFQNAILVR	10	1	1	P07724		0	54.99	3.23296e-05
	High	EccHGDLLEcADDR	3	1	1	P07724	C2(Carbamidomethyl); C3(Carbamidomethyl); C10(Carbamidomethyl)	0	25.5	0.00281171
	Low	VcLLHEK	1	1	1	P07724	C2(Carbamidomethyl)	0.1429	12.06	0.314262
P20029	78 kDa glucose-regulated protein OS=Mus musculus GN=Hspa5 PE=1 SV=3 - [GRP78_MOUSE]	427.775	9.31	1	2	2	11	655	72.3775	5.16064
	A2	Sequence	# PSMs	# Proteins	# Protein Groups	Protein Group Accessions	Modifications	ΔCn	IonScore	Exp Value
	High	IEIESFFEGEDFSETLTR	6	1	1	P20029		0	96.81	1.73013e-09
	High	NILVFDLGGGTFDVSLLTIDNGVFEVVATNGDTHLGGEDFDQR	5	1	1	P20029		0	50.28	6.60981e-05
P19221	Prothrombin OS=Mus musculus GN=F2 PE=1 SV=1 - [THRB_MOUSE]	287.481	2.43	1	1	1	5	618	70.2237	6.43018
	A2	Sequence	# PSMs	# Proteins	# Protein Groups	Protein Group Accessions	Modifications	ΔCn	IonScore	Exp Value
	High	WYQMGIVSWGEGcDR	5	1	1	P19221	C13(Carbamidomethyl)	0	79.57	3.58826e-08
P52480	Pyruvate kinase isozymes M1/M2 OS=Mus musculus GN=Pkm2 PE=1 SV=4 - [KPYM_MOUSE]	282.662	8.85	1	4	4	8	531	57.808	7.47412
	A2	Sequence	# PSMs	# Proteins	# Protein Groups	Protein Group Accessions	Modifications	ΔCn	IonScore	Exp Value
	High	IYVDDGLISLQVK	2	1	1	P52480		0	79.09	9.49491e-08
	High	DAVLNAWAEDVDLR	2	1	1	P52480		0	64.8	3.19542e-06
	High	cDENILWLDYK	2	1	1	P52480	C1(Carbamidomethyl)	0	57.55	9.93227e-06
	High	VNLAMDVGK	2	1	1	P52480		0	53.46	4.8012e-05
P17182	Alpha-enolase OS=Mus musculus GN=Eno1 PE=1 SV=3 - [ENOA_MOUSE]	198.56	18.2	3	4	5	9	434	47.1112	6.80029
	A2	Sequence	# PSMs	# Proteins	# Protein Groups	Protein Group Accessions	Modifications	ΔCn	IonScore	Exp Value
	High	SFVQNYPVVSIEDPFDQDDWGAWQK	3	1	1	P17182		0	73.55	3.09099e-07
	High	VNQIGSVTESLQAcK	1	2	1	P17182	C14(Carbamidomethyl)	0	47.21	0.000226228
	High	LMIEMDGTENK	2	1	1	P17182		0	39.95	0.000637295
	High	GNPTVEVDLYTAK	2	2	1	P17182		0	33.39	0.00510828
	Low	FGANAILGVSLAVCK	1	3	1	P17182		0.8481	11.7	0.520584
P40240	CD9 antigen OS=Mus musculus GN=Cd9 PE=1 SV=2 - [CD9_MOUSE]	179.48	11.06	1	1	1	4	226	25.2409	7.2251
	A2	Sequence	# PSMs	# Proteins	# Protein Groups	Protein Group Accessions	Modifications	ΔCn	IonScore	Exp Value
	High	AIHMALDccGIAGPLEQFISDTcPK	4	1	1	P40240	C8(Carbamidomethyl); C9(Carbamidomethyl); C23(Carbamidomethyl)	0	63.19	3.14225e-06
P10126	Elongation factor 1-alpha 1 OS=Mus musculus GN=Eef1a1 PE=1 SV=3 - [EF1A1_MOUSE]	149.677	9.74	1	3	3	8	462	50.0821	9.01221
	A2	Sequence	# PSMs	# Proteins	# Protein Groups	Protein Group Accessions	Modifications	ΔCn	IonScore	Exp Value
	High	KIGYNPDTVAFVPISGWNGDNMLEPSANMPWFK	1	1	1	P10126		0	96.78	1.87855e-09
	High	YYVTIIDAPGHR	1	1	1	P10126		0	42.82	0.000535456
	High	IGYNPDTVAFVPISGWNGDNMLEPSANmPWFK	4	1	1	P10126	M28(Oxidation)	0	38.09	0.000946956
	High	IGYNPDTVAFVPISGWNGDNMLEPSANMPWFK	2	1	1	P10126		0	29.22	0.00801816
P63017	Heat shock cognate 71 kDa protein OS=Mus musculus GN=Hspa8 PE=1 SV=1 - [HSP7C_MOUSE]	126.137	10.99	2	1	3	13	646	70.8272	5.51611
	A2	Sequence	# PSMs	# Proteins	# Protein Groups	Protein Group Accessions	Modifications	ΔCn	IonScore	Exp Value
	High	NVLIFDLGGGTFDVSILTIEDGIFEVK	11	2	1	P63017		0	44.07	0.000250715
	Low	DAGTIAGLNVLR	1	1	1	P63017		0	15.97	0.266841
	Low	RNTTIPTKQTQTFTTYSDNQPGVLIQVYEGER	1	1	1	P63017		0	12.36	0.551726
P13020	Gelsolin OS=Mus musculus GN=Gsn PE=1 SV=3 - [GELS_MOUSE]	101.934	3.46	1	2	2	6	780	85.8881	6.17627
	A2	Sequence	# PSMs	# Proteins	# Protein Groups	Protein Group Accessions	Modifications	ΔCn	IonScore	Exp Value
	High	VEKFDLVPVPPNLYGDFFTGDAYVILK	2	1	1	P13020		0	41.12	0.000540876
	High	FDLVPVPPNLYGDFFTGDAYVILK	4	1	1	P13020		0	34.13	0.00332276
P62962	Profilin-1 OS=Mus musculus GN=Pfn1 PE=1 SV=2 - [PROF1_MOUSE]	96.0588	10	1	1	1	2	140	14.9475	8.27979
	A2	Sequence	# PSMs	# Proteins	# Protein Groups	Protein Group Accessions	Modifications	ΔCn	IonScore	Exp Value
	High	DSLLQDGEFTMDLR	2	1	1	P62962		0	61.44	5.5988e-06
P62880	Guanine nucleotide-binding protein G(I)/G(S)/G(T) subunit beta-2 OS=Mus musculus GN=Gnb2 PE=1 SV=3 - [GBB2_MOUSE]	89.33	5.29	1	1	1	2	340	37.3071	5.99854
	A2	Sequence	# PSMs	# Proteins	# Protein Groups	Protein Group Accessions	Modifications	ΔCn	IonScore	Exp Value
	High	LLLAGYDDFNcNIWDAMK	2	1	1	P62880	C11(Carbamidomethyl)	0	60.97	6.23871e-06
P01942	Hemoglobin subunit alpha OS=Mus musculus GN=Hba PE=1 SV=2 - [HBA_MOUSE]	76.577	10.56	1	1	1	4	142	15.0758	8.22119
	A2	Sequence	# PSMs	# Proteins	# Protein Groups	Protein Group Accessions	Modifications	ΔCn	IonScore	Exp Value
	High	IGGHGAEYGAEALER	4	1	1	P01942		0	32.85	0.00360566
Q61704	Inter-alpha-trypsin inhibitor heavy chain H3 OS=Mus musculus GN=Itih3 PE=1 SV=3 - [ITIH3_MOUSE]	73.6412	2.59	1	3	3	8	889	99.2957	6.04932
	A2	Sequence	# PSMs	# Proteins	# Protein Groups	Protein Group Accessions	Modifications	ΔCn	IonScore	Exp Value
	High	EVSFDVELPK	3	1	1	Q61704		0	42.81	0.000599522
	Medium	VTFELTYEELLKR	4	1	1	Q61704		0	26.66	0.0189882
	Medium	VTFELTYEELLK	1	1	1	Q61704		0	25.78	0.0268204
P14069	Protein S100-A6 OS=Mus musculus GN=S100a6 PE=1 SV=3 - [S10A6_MOUSE]	70.583	30.34	1	2	2	4	89	10.0443	5.47803
	A2	Sequence	# PSMs	# Proteins	# Protein Groups	Protein Group Accessions	Modifications	ΔCn	IonScore	Exp Value
	High	DQEVNFQEYVAFLGALALIYNEALK	2	1	1	P14069		0	40.19	0.000741825
	High	NKDQEVNFQEYVAFLGALALIYNEALK	2	1	1	P14069		0	30.03	0.00739871
P50247	Adenosylhomocysteinase OS=Mus musculus GN=Ahcy PE=1 SV=3 - [SAHH_MOUSE]	58.66	2.78	1	1	1	1	432	47.6573	6.53662
	A2	Sequence	# PSMs	# Proteins	# Protein Groups	Protein Group Accessions	Modifications	ΔCn	IonScore	Exp Value
	High	VAVVAGYGDVGK	1	1	1	P50247		0	58.66	1.38187e-05
Q8BFR6	AN1-type zinc finger protein 1 OS=Mus musculus GN=Zfand1 PE=1 SV=1 - [ZFAN1_MOUSE]	54.3227	3.36	1	1	1	6	268	30.183	8.104
	A2	Sequence	# PSMs	# Proteins	# Protein Groups	Protein Group Accessions	Modifications	ΔCn	IonScore	Exp Value
	High	MAATQKLVR	6	1	1	Q8BFR6		0	34.02	0.00354669
P60710	Actin, cytoplasmic 1 OS=Mus musculus GN=Actb PE=1 SV=1 - [ACTB_MOUSE]	51.0161	15.2	7	3	3	4	375	41.7097	5.47803
	A2	Sequence	# PSMs	# Proteins	# Protein Groups	Protein Group Accessions	Modifications	ΔCn	IonScore	Exp Value
	High	SYELPDGQVITIGNER	1	7	1	P60710		0	44.67	0.000404314
	Medium	LcYVALDFEQEMATAASSSSLEK	1	2	1	P60710	C2(Carbamidomethyl)	0	24.16	0.0259002
	Medium	VAPEEHPVLLTEAPLNPK	2	2	1	P60710		0	22.5	0.0337405
P29699	Alpha-2-HS-glycoprotein OS=Mus musculus GN=Ahsg PE=1 SV=1 - [FETUA_MOUSE]	50.2239	2.03	1	1	1	2	345	37.3017	6.50732
	A2	Sequence	# PSMs	# Proteins	# Protein Groups	Protein Group Accessions	Modifications	ΔCn	IonScore	Exp Value
	High	cNLLAEK	2	1	1	P29699	C1(Carbamidomethyl)	0	37.65	0.00181239
Q61703	Inter-alpha-trypsin inhibitor heavy chain H2 OS=Mus musculus GN=Itih2 PE=1 SV=1 - [ITIH2_MOUSE]	48.393	6.24	1	2	3	7	946	105.861	7.26904
	A2	Sequence	# PSMs	# Proteins	# Protein Groups	Protein Group Accessions	Modifications	ΔCn	IonScore	Exp Value
	High	NVQFNYPQASVTDVTQNNFHNYFGGSEIVVAGK	3	1	1	Q61703		0	32.36	0.00635937
	Medium	VQFELHYQEVK	3	1	1	Q61703		0	28.24	0.0180712
	Low	IQPSGGTNINEALLR	1	1	1	Q61703		0	20.62	0.0706574
P97449	Aminopeptidase N OS=Mus musculus GN=Anpep PE=1 SV=4 - [AMPN_MOUSE]	43.62	2.28	1	1	1	1	966	109.582	5.89697
	A2	Sequence	# PSMs	# Proteins	# Protein Groups	Protein Group Accessions	Modifications	ΔCn	IonScore	Exp Value
	High	WILQMGFPVITVNTNTGEISQK	1	1	1	P97449		0	43.62	0.000423647
Q8VDN2	Sodium/potassium-transporting ATPase subunit alpha-1 OS=Mus musculus GN=Atp1a1 PE=1 SV=1 - [AT1A1_MOUSE]	43.4667	3.32	5	2	2	3	1023	112.91	5.45264
	A2	Sequence	# PSMs	# Proteins	# Protein Groups	Protein Group Accessions	Modifications	ΔCn	IonScore	Exp Value
	High	LIIVEGcQR	1	5	1	Q8VDN2	C7(Carbamidomethyl)	0	41.11	0.000987439
	Medium	EQPLDEELKDAFQNAYLELGGLGER	2	1	1	Q8VDN2		0	26.43	0.0243435
P26041	Moesin OS=Mus musculus GN=Msn PE=1 SV=3 - [MOES_MOUSE]	39.66	2.25	1	1	1	1	577	67.7249	6.59521
	A2	Sequence	# PSMs	# Proteins	# Protein Groups	Protein Group Accessions	Modifications	ΔCn	IonScore	Exp Value
	High	EVWFFGLQYQDTK	1	1	1	P26041		0	39.66	0.00101655
P10852	4F2 cell-surface antigen heavy chain OS=Mus musculus GN=Slc3a2 PE=1 SV=1 - [4F2_MOUSE]	36.5	5.13	1	1	1	2	526	58.3003	5.90967
	A2	Sequence	# PSMs	# Proteins	# Protein Groups	Protein Group Accessions	Modifications	ΔCn	IonScore	Exp Value
	High	EEDTSLKLENLSLNPYEGLLLQFPFVA	2	1	1	P10852		0	36.5	0.00190291
P28665	Murinoglobulin-1 OS=Mus musculus GN=Mug1 PE=1 SV=3 - [MUG1_MOUSE]	36.3	0.54	1	1	1	2	1476	165.193	6.41748
	A2	Sequence	# PSMs	# Proteins	# Protein Groups	Protein Group Accessions	Modifications	ΔCn	IonScore	Exp Value
	High	FQVENSNR	2	1	1	P28665		0	36.3	0.00159408
P35441	Thrombospondin-1 OS=Mus musculus GN=Thbs1 PE=1 SV=1 - [TSP1_MOUSE]	35.67	2.91	1	1	2	2	1170	129.564	4.95752
	A2	Sequence	# PSMs	# Proteins	# Protein Groups	Protein Group Accessions	Modifications	ΔCn	IonScore	Exp Value
	High	SITLFVQEDR	1	1	1	P35441		0	35.67	0.00317092
	Low	IRLcNSPSPQMNGKPCEGEARETK	1	1	1	P35441	C4(Carbamidomethyl)	0	10.24	0.91785
Q04857	Collagen alpha-1(VI) chain OS=Mus musculus GN=Col6a1 PE=2 SV=1 - [CO6A1_MOUSE]	34.38	1.46	1	1	2	2	1025	108.422	5.36377
	A2	Sequence	# PSMs	# Proteins	# Protein Groups	Protein Group Accessions	Modifications	ΔCn	IonScore	Exp Value
	High	IALVITDGR	1	1	1	Q04857		0	34.38	0.0031916
	Low	FIDNLR	1	1	1	Q04857		0.2381	16.18	0.308468
P26039	Talin-1 OS=Mus musculus GN=Tln1 PE=1 SV=2 - [TLN1_MOUSE]	32.77	1.18	1	1	1	1	2541	269.653	6.17627
	A2	Sequence	# PSMs	# Proteins	# Protein Groups	Protein Group Accessions	Modifications	ΔCn	IonScore	Exp Value
	High	GTEWVDPEDPTVIAENELLGAAAAIEAAAK	1	1	1	P26039		0	32.77	0.0050995
Q9D1H6	NADH dehydrogenase [ubiquinone] 1 alpha subcomplex assembly factor 4 OS=Mus musculus GN=Ndufaf4 PE=2 SV=1 - [NDUF4_MOUSE]	32.3607	4.05	1	1	1	3	173	20.0698	9.39307
	A2	Sequence	# PSMs	# Proteins	# Protein Groups	Protein Group Accessions	Modifications	ΔCn	IonScore	Exp Value
	High	KPSMAPK	3	1	1	Q9D1H6		0	31.92	0.00825854
P01027	Complement C3 OS=Mus musculus GN=C3 PE=1 SV=3 - [CO3_MOUSE]	32.2	0.72	1	1	1	1	1663	186.366	6.72705
	A2	Sequence	# PSMs	# Proteins	# Protein Groups	Protein Group Accessions	Modifications	ΔCn	IonScore	Exp Value
	High	EVVADSVWVDVK	1	1	1	P01027		0	32.2	0.00750187
Q6GQT1	Alpha-2-macroglobulin-P OS=Mus musculus GN=A2mp PE=2 SV=2 - [A2MP_MOUSE]	28.61	0.95	1	1	1	3	1474	164.248	6.60986
	A2	Sequence	# PSMs	# Proteins	# Protein Groups	Protein Group Accessions	Modifications	ΔCn	IonScore	Exp Value
	Medium	TEVSNNHVLIYLDK	3	1	1	Q6GQT1		0	28.61	0.014323
Q8BWQ4	FtsJ methyltransferase domain-containing protein 1 OS=Mus musculus GN=Ftsjd1 PE=2 SV=1 - [FTSJ1_MOUSE]	28.5048	1.17	1	1	1	2	767	87.0857	7.07861
	A2	Sequence	# PSMs	# Proteins	# Protein Groups	Protein Group Accessions	Modifications	ΔCn	IonScore	Exp Value
	Medium	KMMETLSWK	2	1	1	Q8BWQ4		0	22.23	0.0484713
P00342	L-lactate dehydrogenase C chain OS=Mus musculus GN=Ldhc PE=1 SV=2 - [LDHC_MOUSE]	25.39	2.71	2	1	1	1	332	35.8891	8.20654
	A2	Sequence	# PSMs	# Proteins	# Protein Groups	Protein Group Accessions	Modifications	ΔCn	IonScore	Exp Value
	High	LVIITAGAR	1	2	1	P00342		0	25.39	0.00476962
Q9Z1P8	Angiopoietin-related protein 4 OS=Mus musculus GN=Angptl4 PE=2 SV=1 - [ANGL4_MOUSE]	24.9	3.9	1	1	1	2	410	45.5098	8.1333
	A2	Sequence	# PSMs	# Proteins	# Protein Groups	Protein Group Accessions	Modifications	ΔCn	IonScore	Exp Value
	Medium	DGFGDPQGEFWLGLEK	2	1	1	Q9Z1P8		0	24.9	0.0257257
Q69ZQ2	Pre-mRNA-splicing factor ISY1 homolog OS=Mus musculus GN=Isy1 PE=1 SV=2 - [ISY1_MOUSE]	24.65	2.11	1	1	1	4	285	32.9689	5.17334
	A2	Sequence	# PSMs	# Proteins	# Protein Groups	Protein Group Accessions	Modifications	ΔCn	IonScore	Exp Value
	Medium	mELLQK	4	1	1	Q69ZQ2	M1(Oxidation)	0	24.65	0.0459309
P97477	Aurora kinase A OS=Mus musculus GN=Aurka PE=1 SV=1 - [AURKA_MOUSE]	23.69	2.28	1	1	1	7	395	44.7442	9.37842
	A2	Sequence	# PSMs	# Proteins	# Protein Groups	Protein Group Accessions	Modifications	ΔCn	IonScore	Exp Value
	Medium	TTVPFGPKR	7	1	1	P97477		0	23.69	0.0329223
P41216	Long-chain-fatty-acid--CoA ligase 1 OS=Mus musculus GN=Acsl1 PE=1 SV=2 - [ACSL1_MOUSE]	23.11	2.43	1	1	1	8	699	77.9014	7.15186
	A2	Sequence	# PSMs	# Proteins	# Protein Groups	Protein Group Accessions	Modifications	ΔCn	IonScore	Exp Value
	Medium	KcGVEIISLKALEDLGR	8	1	1	P41216	C2(Carbamidomethyl)	0	23.11	0.0312738
O88888	Amyloid beta A4 precursor protein-binding family A member 3 OS=Mus musculus GN=Apba3 PE=1 SV=1 - [APBA3_MOUSE]	22.14	2.1	1	1	1	1	571	60.6795	5.08447
	A2	Sequence	# PSMs	# Proteins	# Protein Groups	Protein Group Accessions	Modifications	ΔCn	IonScore	Exp Value
	Medium	MGQAQEAmDRVK	1	1	1	O88888	M8(Oxidation)	0	22.14	0.0397112
P41139	DNA-binding protein inhibitor ID-4 OS=Mus musculus GN=Id4 PE=1 SV=1 - [ID4_MOUSE]	20.94	29.81	1	1	1	1	161	16.5856	8.32373
